1 **Title**

2

3 Is the replication crisis a problem for biologists? A geometric morphometric approach.

4

5 **Authors**

6

7 Juan Vrdoljak\*<sup>1</sup>, Kevin Imanol Sanchez<sup>1</sup>, Roberto Arreola-Ramos<sup>1</sup>, Emilce Guadalupe Diaz  
8 Huesa<sup>2</sup>, Alejandro Villagra<sup>3</sup>, Luciano Javier Avila<sup>1</sup> and Mariana Morando<sup>1</sup>.

9

10 <sup>1</sup> Instituto Patagónico para el Estudio de los Ecosistemas Continentales, Consejo  
11 Nacional de Investigaciones Científicas y Técnicas (IPEEC-CONICET), Boulevard  
12 Almirante Brown 2915, U9120ACD, Puerto Madryn, Chubut, Argentina.

13 <sup>2</sup> Instituto de Diversidad y Evolución Austral, Consejo Nacional de Investigaciones  
14 Científicas y Técnicas (IDEAUS-CONICET), Boulevard Almirante Brown 2915,  
15 U9120ACD, Puerto Madryn, Chubut, Argentina.

16 <sup>3</sup> Universidad Nacional de la Patagonia San Juan Bosco (UNPSJB), Bv. Almte Brown  
17 3051, U9120ACD Puerto Madryn, Chubut, Argentina.

18 \* Corresponding author: [juan.vrdoljak@gmail.com](mailto:juan.vrdoljak@gmail.com)

19

## 20 **Abstract**

21

22 Replicability of findings is the key factor of scientific reliability. However, literature on  
23 this topic is scarce and apparently taboo for large scientific areas. Some authors named  
24 the failure to reproduce scientific findings ‘replication crisis’. Geometric  
25 morphometrics, a vastly used technique, is especially silent on replication crisis  
26 concern. Nevertheless, some works pointed out that sharing morphogeometric  
27 information is not a trivial fact, but need to be careful and meticulous. Here, we  
28 investigated the replicability of geometric morphometrics protocols on complex shapes  
29 and measurement error extension in three different types of taxa, as well as the  
30 potentiality of these protocols to discriminate among closely related species. We found  
31 a wide range of replication error that contributed from 19.5% to 60% of the total  
32 variation. Although, measurement error decreased with the complexity of the quantified  
33 shape, it often maintained high values. All protocols were able to discriminate between  
34 species, but more morphogeometric information does not imply better performance. We  
35 present evidence of replication crisis in life sciences and highlight the need to explore in  
36 deep different sources of variation that could lead to low replicability findings. Lastly,  
37 we enunciate some recommendations in order to improve the replicability and reliability  
38 of scientific findings.

39

## 40 **Keywords**

41

42 Geometric morphometrics, Measurement error, Replication crisis.

43

## 44 **Introduction**

45

46 The so-called replication crisis is a hot topic in specialized journals of statistics and  
47 psychology [1, 2] and a new field to explore for biologists [3]. The meaning of  
48 ‘replication crisis’, in broad sense, is associated with the failure to reproduce results of  
49 studies. However, most scientific researches never attempt to replicate results, possibly  
50 because – fed by the ‘publish or perish’ dogma – most scientific journals have within  
51 their scopes explicit policies against publishing replication studies [4]. Non-replicability  
52 leads to lack of reliability in scientific findings because it compromises our belief on the  
53 generality of scientific theories.

54 Publication bias, questionable research practice (QRP) and over-confidence on null  
55 hypothesis significance test (NHST) are bad practices that affect replicability without  
56 threatening the generality of scientific facts [2, 5]. In addition to the rejection of  
57 replication articles, the strong tendency to publish only significant results is the second  
58 factor that influences publication bias [6, 7, 8]. QRP refers to a set of post-hoc decisions  
59 that include: data point exclusion to improve statistical significance, stopping data  
60 collection because results show significant differences, no report of parameters that  
61 were statistically non-significant, among others [3].

62 The NHST and the p-value thresholds are the current paradigms for research,  
63 publication and discovery in biological and social sciences [9, 10]. This set of ideas  
64 leads to several mistakes and could be the cause of publication bias and QRPs. Among  
65 the main mistakes we can mention: the dichotomization of results into “significant” and  
66 “no significant”; focus only on significant results even when they are irrelevant (e.g.  
67 descriptive statistics); ignore other evidence such as magnitude of effect; several  
68 misinterpretations of p-value; and the implausibility of null hypothesis when the effects  
69 are small, because the possibilities of systematic bias and variation due to highly  
70 variable measurements could result in similar small effects [11, 12].

71 Measurement error (ME) is an uncontrolled variation that could aggravate the  
72 replication crisis [1]. Given its random nature, ME is frequently associated with noise  
73 around the true values. Thus, if an effect is found in a noisy statistical environment,  
74 then it is logical to think that the actual effect is really strong [13]. However, effect size  
75 estimation can be exaggerated and the outcomes can result biased by a poor  
76 measurement [1, 14].

77 Geometric morphometric is a simple technic to quantify, identify and describe shapes  
78 independently of size. Thus, three steps are necessary to obtain morphometric data:  
79 photograph the object, placement of landmarks (or outliner contours) in anatomical  
80 positions and superimposition of these points [15, 16]. There are a few dozens of  
81 articles that help geometric morphometric operators to guide and improve their analysis  
82 [17, 18, 19, 20] and at least 21,500 articles that made use of this technique (according to  
83 a brief search in Academic Google). However, little is known about the source of  
84 variation that could generate spurious results [21, 22, 23, 24].

85 In this sense, Fruciano (2016) reviewed the common sources of error in geometric  
86 morphometrics with emphasis on ME. He enunciated different forms to assess ME and  
87 concluded that researchers have to take into account certain considerations that

88 compromise accurate measurement, e.g. effort invested in digitalization of images [25],  
89 trade-off between sample size and specimen quality [21, 26], maintenance of  
90 coplanarity in 3D structure [27], among others. In complex shapes, several conflictive  
91 points could lead to overinflate ME due to low accuracy landmarks [28] or high  
92 landmarking bias [29]. Moreover, a good treatment of conflictive points could be the  
93 cornerstone to increase replicability in geometric morphometrics [30].

94 The term complex shapes refer to certain configurations where the placement of  
95 landmarks is not trivial. In this regard, Bookstein (1991) described type I, II and III  
96 landmarks according to a scale from more to less clarity of the anatomical point,  
97 respectively [31]. Several authors reported that type III landmarks are clearly associated  
98 with high ME [29, 32, 33, 34]. Given that the analytical procedure is the same for these  
99 types of landmarks and that this distinction has a strong subjective or arbitrary character  
100 (35), several articles do not make use of this distinction. On the other hand, following  
101 the aim to describe complex shapes, curves or contour are more suitable because point-  
102 to-point homology is hard to ensure [36, 37]. However, no measurement technique is  
103 error free. In fact, there is a positive relationship between the number of semilandmarks  
104 used to describe a curve and the ME [38]. Therefore, there is a trade-off between the  
105 ME and the potential of description in these techniques.

106 Here, we carry out the first study to analyze the extent of replication crisis in life  
107 sciences using geometric morphometrics, which is a widely used tool in biology and  
108 anthropology. Different spurious (later called extrinsic) sources of variation were  
109 analyzed. In this sense, the principal aim of this work was to quantify these sources of  
110 variation through different geometric morphometric methods in lizards and discuss the  
111 principal implications for biological inferences. Additionally, we evaluated how ME  
112 extend to other taxa (a fly and a plant) and assess the potentiality of each geometric  
113 morphometric method to describe and discriminate among closely related species.  
114 Finally, we advocate the use of a clear and solid statistic framework without falling into  
115 the apparent need of QRP or NHST in order to respond these aims.

116

## 117 **Materials and methods**

118

119 *Experimental designs, sample, data collection and methodological approach*

120

121 The following three designs were developed in order to address three different  
122 objectives: The first objective was to analyze different factors that may affect  
123 replication. To address this, 25 photographs of male lizards *Liolaemus elongatus* were  
124 mirrored and then landmarked/outlined each side twice by five operators: among-  
125 operators design. The second objective was to estimate ME across three very different  
126 taxa: *L. elongatus* lizards, the fly *Drosophila buzzatii* [39] and the grape *Vitis riparia*  
127 (data available on <https://dataverse.harvard.edu/dataverse/VitisLeafVariation>, [40]). In  
128 this case, each of 25 photographs was landmarked/outlined in quadruplicate and  
129 analyzed each taxon separately: across-taxa design. The third objective was to assess the  
130 potentiality of each morphometric configuration (described below) to differentiate  
131 among closely similar shapes. Thus, 25 male specimens of three closely related lizard  
132 species (*L. elongatus*, *L. shitan* and *L. choique*; [41]) with several morphological  
133 similarities were landmarked/outlined: related-species design (details of specimen's  
134 voucher numbers, collection locality and other data on appendix 1).

135 We took dorsal photographs of the head of each specimen using a Canon 1000D camera  
136 mounted in a fixed tripod. For flies, we removed left wing, mounted them on slides with  
137 DPX and photographed them at 40x magnification using a digital camera attached to a  
138 microscope (Nikon E200). To characterize the shape, we placed landmarks in four  
139 different configurations using TpsDIG 2.31 [42]. Shape variation was estimated by  
140 general Procrustes analysis [43, 44], and then we performed principal component  
141 analysis to summarize the information of shape in uncorrelated form. In addition, we  
142 employed another approach to quantify shape variation based on elliptic Fourier  
143 descriptors [45]. In this sense, outlines from digital images were used to obtain Fourier  
144 coefficients normalized for size, rotation and starting point, then we built a variance-  
145 covariance matrix that was used as input in a principal components analysis.  
146 Morphometric analyses were performed with R statistical software [46] packages  
147 Momocs [47] and geomorph [48].

148 For each of the three designs, we developed five morphometric protocols: two  
149 landmark-only protocols with six and ten landmarks for lizards and leaves and ten and  
150 fifteen landmarks for flies (P-L and F-L protocols for partial-landmark and full-  
151 landmark respectively); two semilandmark protocols [37], both starting from the same  
152 P-L configuration, with one and two curves (P-S and F-S protocols for partial-  
153 semilandmark and full-semilandmark respectively). In both cases, partial protocols (P-L  
154 and P-S) were less time expensive and could explain more stable and homologous

155 configuration but less explanatory power than full protocols (F-L and F-S). It should be  
156 noted that the partial methods are a subset of full methods. Lastly, we used a contour  
157 protocol, a novelty in herpetological research.

158 We examined one-side morphologies except in the cases of lizards' contours in the  
159 across-taxa and related-species designs, where the whole pineal scale was used. In the  
160 case of lizards' contour in the among-operators design, half of pineal scale and whole  
161 parietal scale were outlined (Appendix 2 includes details of contours and landmark  
162 configuration; also see [40, 49, 50]).

163 To carry out the among-operators design, the order of the five protocols was randomly  
164 selected for each operator. Also, in order to represent the greatest possible variation in  
165 ME, operators with different degree of knowledge on morphometric techniques were  
166 chosen. For the other two designs (across-taxa and related-species), only one of the  
167 operators performed all five protocols. Finally, we computed the data gathering  
168 processing time for each protocol applied to ten specimens randomly selected from each  
169 taxon.

170

### 171 *Models and statistical analysis*

172

173 Among-operators design: we used hierarchical models to estimate seven variance  
174 effects: specimen variation, operator variation, the interaction with side and between  
175 them, resulting in specimen\*operator, specimen\*side, operator\*side and  
176 specimen\*operator\*side variation and, finally, ME. Specimen and specimen\*side  
177 variation (latter known as fluctuation asymmetry) are two intrinsically natural sources  
178 of variation (intrinsic variation), while the other variance effects depend on operator  
179 errors, biased measurement, and consistency of these (extrinsic variation, composed of  
180 ME and replication factors). As a result of this model, we evaluated different factors  
181 affecting the replication (operator or operator interaction effects), and thus reliability of  
182 the measurement technique in a relative manner with intrinsic variation. Across-taxa  
183 design: to evaluate ME of each of the five protocols among taxa as accurately as  
184 possible, we used hierarchical models that included only specimen variance and ME, i.e.  
185 each taxa was analyzed separately. In this sense, each protocol was applied to grape  
186 leaves, fly wings and lizard heads by one operator. Related-species design: we analyzed  
187 the effects of morphological differences among species (details of models on appendix  
188 3).

189 It is simple to predict that the placement of more points implies more processing time.  
190 For this reason, we employed a linear regression between processing time and centroid  
191 size. Centroid size is more suitable to explain processing time than the simple sum of  
192 landmark and semilandmark points, since it is a good proxy of number of points by  
193 definition (the square root of the sum of the squared distances of each landmark to the  
194 centroid configuration, [16]), and the operators could spend more time in mouse  
195 displacement in large than small sizes with equal number of points.

196 In the described protocols, except for the related-species design where we explored the  
197 minimal number of principal component (PC) axes needed to differentiate among  
198 species, we employed the first PC axes that explain at least 60% of the total variation to  
199 perform statistical analyzes. Given the large number of PC axes (8 to 48), our decision  
200 criterion was taken to explain more than half of the total variation. Furthermore, we also  
201 investigated the rest of the PC axes in search of substantial morphological changes to  
202 incorporate into statistical analyzes; however, we did not find such changes in those PC  
203 axes.

204 The models were fitted within a Bayesian framework that eased implementation of  
205 variance components and its uncertainty. Posterior distribution of parameters were  
206 estimated using three independent Markov Chain Monte Carlo (MCMC) runs for  
207 100,000 iterations and 20% of burn-in each implemented in JAGS 4.3.0 [51] using the  
208 R packages `jagsUI` [52] and `rjags` [53]. The observations were centered and standardized  
209 to reduce autocorrelation of chains [54]. Convergence was assessed using Gelman and  
210 Rubin statistics  $\hat{R}$  [55] and by visual inspection of trace plots. We used weakly  
211 informative prior distributions to include small amounts of information on parameter  
212 and hyperparameter such as non-negative possibilities and to avoid meaningless values  
213 [56, 57]. Finally, we denoted differences between two samples of the response variable  
214 as standardized difference, whereas we reserved effect size to the distribution of the  
215 standardized differences from posterior distribution ([58] and analytical according to  
216 [59]) and reported mean and High Posterior Density interval (HPD) using the R package  
217 `coda` [60].

218

## 219 **Results**

220

221 *Among-operators design*

222



223 We found extrinsic variation with all five protocols considering the first PC that  
224 explains the greatest morphological variation (Fig 1). While the contour protocol had  
225 the best performance (highest sources of intrinsic variation and smallest sources of  
226 extrinsic variation), the other protocols showed a trade-off among different sources of  
227 variation. In this sense, both partial protocols showed the highest levels of variation  
228 among operators and explained very similar intrinsic variation with a greater uncertainty  
229 in P-S protocol. Full protocols explained more intrinsic variation than the previous,  
230 where F-S protocol captured more extrinsic variation than F-L protocol. As a good  
231 proxy of measurement bias, we found high levels of operator\*specimen variation in F-L  
232 protocol due to the consistent placement of two conflictive landmarks on some  
233 specimens (Fig S1.a).

234 Replication error was always greater than ME for all protocols (see PC1 in Fig 2). More  
235 than half of the total variation was explained by replication factors in P-L protocol  
236 (56.7%), closely followed by F-L and P-S with almost half of the total variation (48%  
237 and 47.7%, respectively). In contrast, replication error contributed 30.4% of mean  
238 variation to the whole model in F-S and remarkably less in contour protocol (19.6%).  
239 Nevertheless, ME explained no negligible variation in all protocols. In this sense, P-S  
240 expressed noticeably greater variation of ME (19.5%) than contour protocol (9.5%),  
241 whereas P-L, F-L and F-S showed similar variation (14.4%, 12.4% and 14.2%,  
242 respectively).

243 Given all PCs analyzed, contour protocol maintained lowest mean values of extrinsic  
244 variation (Fig 2). More than 60% of the total variation was explained by extrinsic  
245 factors in the first three PCs of the P-S protocol. In F-S protocol, the first and third PCs  
246 showed smaller extrinsic variation than the others. Both P-L and F-L protocols  
247 improved the levels of extrinsic variation through the PCs, however high levels of  
248 operator\*specimen variation were found in PC2 of the former protocol (Fig S2), due to  
249 a consistent bias on some specimens (Fig S1.b).

250

### 251 *Across-taxa design*

252

253 This design exposed at least three clear patterns (Fig 3). First and more conspicuous,  
254 ME variation resulted highest in lizards, followed by flies and finally leaves (the  
255 averages of the ME variation weighted by the morphological variation explained by  
256 each PC were 28.2%, 9.8% and 2.6%, respectively). In particular, the protocol with



257 greatest ME contributed 57.3%, 19.8% and 7.6% to the total variation while the  
258 protocol with smallest ME contributed 15%, 11.3% and 1.5% to the total variation in  
259 lizards, flies and leaves respectively. Thereby, we found a wide range of ME dependent  
260 on both taxa and protocol, meaning that some protocols are more suitable for one taxon  
261 than other.

262 Second, as we expected, processing time was longest in protocols with more points  
263 (understanding points as a number of landmarks plus semilandmarks), i.e. the  
264 processing time for all taxa follows from longer to smaller: F-S, P-S, F-L and P-S.  
265 Indeed, we found a positive correlation between processing time and specimen size  
266 across protocols (excluding contour protocol for the analysis, Fig S3).

267 Third and more interesting, contour protocol showed an independent pattern of  
268 processing time with respect to the other protocols. In this sense, contour processing  
269 time resulted smaller than F-S protocol in lizards but higher than all protocols in the  
270 other taxa. Moreover, the difference between contour and F-S protocols mean time  
271 elapsed resulted in 0.8, 1.96 and 4.87 (but 2.12, 7.89 and 4.29 of standardized  
272 differences) for lizards, flies and leaves respectively.

273

#### 274 *Related-species design*

275

276 All protocols were able to discriminate between species more or less clearly (Table 1).  
277 In this sense, both semilandmark protocols presented highly clear differences among  
278 species with a slightly better performance in the partial protocol. However, the  
279 morphological information explained by these protocols resulted redundant (Fig S1c)  
280 and more time expensive in the full protocol. The landmark protocols also showed  
281 highly clear differences among species, but each protocol explained dissimilar  
282 morphological information (Fig S1d). It is critical to point out that main differences  
283 between species for PC1 of F-L protocol were due to changes on the same conflictive  
284 landmarks that were found that strongly biased the among-operators design (Fig S1a).  
285 Contrastingly, the differences among species found by contour protocol were slightly  
286 less clear than the previous mentioned, indeed it was necessary to seek in more than 2  
287 PC axes.

288

289 Table 1: Mean values, High Posterior Density interval (HPD) of 95 and 90% of the effect size  
290 distribution resulting from species comparisons. Number of Principal Components (PC)  
291 analyzed to reach a clear differentiation between species.

|          |    | <i>L. elongatus – L. shitan</i> |          |       |           |             | <i>L. elongatus – L. choique</i> |          |       |           |             | <i>L. shitan – L. choique</i> |          |       |           |             |       |
|----------|----|---------------------------------|----------|-------|-----------|-------------|----------------------------------|----------|-------|-----------|-------------|-------------------------------|----------|-------|-----------|-------------|-------|
|          |    | HPD<br>2.5                      | HPD<br>5 | Mean  | HPD<br>95 | HPD<br>97.5 | HPD<br>2.5                       | HPD<br>5 | Mean  | HPD<br>95 | HPD<br>97.5 | HPD<br>2.5                    | HPD<br>5 | Mean  | HPD<br>95 | HPD<br>97.5 |       |
| Protocol | PS | PC1                             | -1.70    | -1.61 | -1.13     | -0.65       | -0.57                            | 0.09     | 0.17  | 0.63      | 1.08        | 1.18                          | -2.39    | -2.29 | -1.76     | -1.24       | -1.14 |
|          |    | PC2                             | -1.11    | -1.02 | -0.56     | -0.09       | -0.01                            | -2.86    | -2.77 | -2.20     | -1.64       | -1.53                         | 1.02     | 1.13  | 1.64      | 2.16        | 2.25  |
|          | FS | PC1                             | -1.54    | -1.45 | -0.98     | -0.51       | -0.42                            | 0.07     | 0.17  | 0.61      | 1.08        | 1.15                          | -2.19    | -2.10 | -1.59     | -0.97       | -1.08 |
|          |    | PC2                             | -0.92    | -0.83 | -0.38     | 0.07        | 0.16                             | -2.11    | -2.03 | -1.51     | -1.02       | -0.91                         | 0.55     | 0.65  | 1.13      | 1.62        | 1.71  |
|          | C  | PC1                             | -0.84    | -0.75 | -0.30     | 0.15        | 0.23                             | -1.96    | -1.86 | -1.36     | -0.87       | -0.78                         | 0.50     | 0.58  | 1.06      | 1.54        | 1.65  |
|          |    | PC3                             | -1.65    | -1.54 | -1.07     | -0.59       | -0.52                            | -0.85    | -0.77 | -0.32     | 0.13        | 0.22                          | -1.31    | -1.22 | -0.75     | -0.29       | -0.19 |
|          | PL | PC1                             | -1.73    | -1.64 | -1.16     | -0.68       | -0.59                            | -0.34    | -0.26 | 0.18      | 0.63        | 0.71                          | -1.94    | -1.83 | -1.34     | -0.83       | -0.76 |
|          |    | PC2                             | -0.43    | -0.33 | 0.11      | 0.57        | 0.65                             | -2.45    | -2.34 | -1.81     | -1.29       | -1.19                         | 1.29     | 1.39  | 1.92      | 2.45        | 2.56  |
|          | FL | PC1                             | -1.05    | -0.97 | -0.51     | -0.06       | 0.03                             | 0.48     | 0.58  | 1.05      | 1.52        | 1.61                          | -2.08    | -2.16 | -1.56     | -1.06       | -0.95 |
|          |    | PC2                             | 0.49     | 0.58  | 1.05      | 1.53        | 1.62                             | 0.42     | 0.50  | 0.98      | 1.45        | 1.55                          | -0.47    | -0.38 | 0.08      | 0.53        | 0.62  |

292

293 Protocols: PS: Partial-Semilandmark, FS: Full-Semilandmark, C: Contour, PL: Partial-  
294 Landmark, FL: Full-Landmark.

295

296

## 297 Discussion

298

299 We analyzed several factors of replication error and ME in geometric morphometrics,  
300 and also the potentiality of each developed protocol. We found worrying levels of  
301 extrinsic variation across the whole study, highlighting the need of in depth inquiry on  
302 replication crisis in life sciences. Moreover, we have shown that conformational  
303 changes with a high risk of measurement bias might exaggerate the true morphological  
304 differences, further aggravating concern about replication crisis.

305 In addition, little is known about the reproducibility of geometric morphometrics  
306 results, much less how the decision making impacts on these results. Fagertun et al  
307 (2014) [30] reported that the operator variation was associated to particular landmarks  
308 (also reported by [28, 61, 62]) and that such variation resulted similar to variation  
309 among individuals. However, what they called error term (it was not the ME by model  
310 construction) resulted twice than each of the previous mentioned variation, while  
311 Robinson and Terhune (2017) [62], Fruciano et al (2017) [63] and Shearer et al (2017)  
312 [64] found that highest variation was attributable to inter-operator factor. In agreement  
313 with these last three works, we show that the replication error (i.e. inter-operator  
314 factors) was always greater than ME, and that in most cases, the total extrinsic variation  
315 resulted greater than intrinsic variation. A clear operational conclusion should be  
316 digitizing on original images by one operator rather than utilizing data sets developed  
317 by more than one operator [63, 64]. Moreover, replication factors accounted for at least  
318 19% of the total variation and rose to almost 60% in the less replicable protocol. In this

319 regard, we also want to point out that the replication crisis is a fact in life sciences [3,  
320 65, 66].

321 Bias could be defined as systematic error. Unlike any random error, measurement bias  
322 could lead to mean differences between groups when this does not exist. However, in  
323 geometric morphometrics, Fruciano et al (2017) [63] showed that bias accounts for a  
324 small proportion of variation and becomes significant when highly variable landmarks  
325 were removed. We found biased measures on two different protocols: F-L and P-L.  
326 Variation due to these biased measures were captured by PC1 (42.5%) and PC2  
327 (16.1%), respectively. Curiously, *L. choique* was differentiated from the other species  
328 mainly by morphological changes around the two conflictive landmarks involved in the  
329 measurement bias of F-L protocol. If the operator's experience may influence in the  
330 degree of biased measurement [64], then bias on F-L protocol could become seriously  
331 problematic.

332 Measurement error is a widely studied issue in the scientific literature and a concern for  
333 a large percentage of publications [14]. Some authors predict that with technological  
334 advances, ME would probably become a less frequent problem but the large amount of  
335 data available obtained by other researchers could incorporate new sources of variation  
336 [63, 67, 68]. Our findings indicate that there is a relationship between complex shapes  
337 and ME. In this way, photographed lizards had some broken or missing scales and  
338 colors that made difficult the digitalization. The width of *Drosophila*'s veins might be  
339 the key factor of the ME levels found here, because the intersection of them is not clear.  
340 By last, leaves had high specimen variation and clear positions to landmarks or  
341 contours.

342 Another key factor in deciding how to digitize samples is the processing time. Despite  
343 the fact that this factor resulted similar among each protocol and taxon, the contour  
344 protocol showed a distinctive pattern: the processing time was positively correlated with  
345 size and complexity. In this sense, the effect of size is expressed in the differentiation  
346 between flies and lizards, where the contour of the former occupied almost the entire  
347 image while the contour of the latter occupied a little place in the image. On the other  
348 hand, the flies' wing is an appendix more or less round, and clearly distinguishes itself  
349 from the innumerable grape leaf peaks, and in this sense we described the difference in  
350 the processing time due to complexity (appendix 2).

351 Geometric morphometrics is ubiquitous, well accepted and a practical tool to quantify  
352 morphological phenotypes [69, 70, 71], fluctuating asymmetry [72, 73], acoustic signals

353 [74], useful forensic patterns [75, 76] among others. Selecting a configuration that  
354 faithfully represents the shape analyzed is an obvious but not a trivial notion. Here, we  
355 studied the potentiality of each protocol to discriminate among species and found that  
356 more landmark points does not necessary explain more shape information. Indeed, P-S  
357 resulted better than F-S protocol to discriminate among species (Table 1). F-L protocol  
358 also differentiates species with high performance; however its relationship with  
359 measurement bias detracts from this differentiation (Fig S1a). Despite contour protocol  
360 expressed differences at one scale level, species discrimination was successful  
361 highlighting that this method deserves to be studied in depth for its high performance in  
362 all designs.

363 Certain recommendations should be noted. First and foremost, each morphogeometric  
364 stage (up to results) must be developed by one person. The great variation found in this  
365 work was only the result of placement of landmarks by five operators. If other five  
366 operators had photographed each or some specimens, for instance, then the extrinsic  
367 variation should be greater. Second, search in bibliography and select homologous  
368 positions for landmarks placement are good practices to improve replication. Moreover,  
369 pioneer morphometric studies need to be more careful and seek the most stable  
370 landmarks configuration by pilot tests. Third, quantify ME and, if possible, add to the  
371 whole model. There are many ways to estimate ME in geometric morphometrics [24],  
372 but most of them entail an extra effort such as multiple digitizations, learning about  
373 novel methods, good data management, among others; instead of this, most researchers  
374 prefer to focus their efforts on expanding their dataset. Fourth, select a method that has  
375 a high quality-processing time ratio. Sometimes, long processing time can enhance the  
376 ME. Fifth, complex forms do not necessarily need complex landmarks conformation.  
377 We have shown that there are not many differences between the “resolution” of partial  
378 and full protocols, but the latter needs considerable more processing time. Sixth, be  
379 careful (or be Bayesian) when the underlying effect is small and sampling error is large,  
380 because experiments that achieve statistical significance must have exaggerated effect  
381 sizes and are likely to have the wrong sign [77].

382 Overall, our results call researchers to reflect on their conclusions’ extent and what this  
383 implies, for instance, in the widespread discourse of scientific truth and scientific unity  
384 [78]. Moreover, this problem could get worse if we take into account some of the  
385 current proclamations about the role of subjectivity in the scientist's tasks, for example  
386 the criticism developed by Garnett and Christidis (2017) [79] on the arbitrariness of

387 taxonomy (but see [80, 81, 82]). We invite other researchers to repeat this kind of assay  
388 in their disciplines to understand how deep is the crisis of replication in the natural  
389 sciences.

390

### 391 **Authors' contribution**

392

393 JV designed the experiment, performed the analyses and drafted the manuscript. JV,  
394 KIS, RAR, EDH and AV generated the dataset. JV, KIS, and MM corrected and  
395 subsequently rewrote the manuscript. LJA and JV contributed to field sampling. All  
396 authors gave final approval for publication.

397

### 398 **Funding**

399

400 Financial support was provided by the following grants: ANPCYT-FONCYT  
401 1397/2011 (LJA); ANPCYT-FONCYT 1252/2015, PIP-CONICET 0336/13 (MM), and  
402 a doctoral fellowship (JV) from Consejo Nacional de Investigaciones Científicas y  
403 Técnicas (CONICET).

404

### 405 **Acknowledgements**

406

407 We thank members of the Grupo de Herpetología Patagónica (GHP) for assistance in  
408 field collections, in the laboratory, and/or assistance in animal curation procedures. We  
409 thank the fauna authorities from Río Negro, Neuquén, Mendoza, and Chubut Provinces  
410 for collection permits.

411

### 412 **References**

413

- 414 [1] Loken E, Gelman A. 2017 Measurement error and the replication crisis. *Science*,  
415 **355**, 584-585. (doi: 10.1126/science.aal3618)
- 416 [2] Fidler F, Wilcox J. Reproducibility of Scientific Results, The Stanford Encyclopedia  
417 of Philosophy, California: Stanford University press, 2018.
- 418 [3] Fraser H, Parker T, Nakagawa S, Barnett A, Fidler F. 2018. Questionable research  
419 practices in ecology and evolution. *PloS one*, **13**, e0200303. (doi:  
420 10.1371/journal.pone.0200303)

- 421 [4] Schmidt S. 2009. Shall we really do it again? The powerful concept of replication is  
422 neglected in the social sciences. *Rev Gen Psychol*, **13**, 90-100. (doi: 10.1037/a0015108)
- 423 [5] Shrout PE, Rodgers JL. 2018. Psychology, science, and knowledge construction:  
424 Broadening perspectives from the replication crisis. *Annu Rev Psychol*, **69**, 487-510.  
425 (doi: 10.1146/annurev-psych-122216-011845)
- 426 [6] Fanelli D. 2009. How many scientists fabricate and falsify research? A systematic  
427 review and meta-analysis of survey data. *PloS one*, **4**, e5738. (doi:  
428 10.1371/journal.pone.0005738)
- 429 [7] Smith DR, Hardy IC, Gammell MP. 2011. Power rangers: no improvement in the  
430 statistical power of analyses published in *Animal Behaviour*. *Animal Behaviour*, **1**, 347-  
431 352. (doi: 10.1016/j.anbehav.2010.09.026)
- 432 [8] Button KS, Ioannidis JP, Mokrysz C, Nosek BA, Flint J, Robinson ES, Munafò MR.  
433 2013. Power failure: why small sample size undermines the reliability of neuroscience.  
434 *Nat Rev Neurosci*, **14**, 365. (doi: 10.1038/nrn3475)
- 435 [9] Ioannidis JP. 2018 The proposal to lower P value thresholds to. 005. *Jama*, **319**,  
436 1429-1430. (doi: 10.1001/jama.2018.1536)
- 437 [10] Dushoff J, Kain MP, Bolker BM. 2019 I can see clearly now: reinterpreting  
438 statistical significance. *Methods Ecol Evol*, **10**, 756-759. (doi: 10.1111/2041-  
439 210X.13159)
- 440 [11] McShane BB, Gal D, Gelman A, Robert C, Tackett JL. 2019 Abandon statistical  
441 significance. *Am Stat*, **73**, 235-245. (doi: 10.1080/00031305.2018.1527253)
- 442 [12] Amrhein V, Greenland S, McShane B. 2019 Scientists rise up against statistical  
443 significance. *Nature*, **567**, 305-307. (doi: 10.1038/d41586-019-00857-9)
- 444 [13] Brakenhoff TB, Van Smeden M, Visseren FL, Groenwold RH. 2018 Random  
445 measurement error: why worry? An example of cardiovascular risk factors. *PloS one*,  
446 **13**, e0192298. (doi: 10.1371/journal.pone.0192298)
- 447 [14] Brakenhoff TB, Mitroiu M, Keogh RH, Moons KG, Groenwold RH, van Smeden  
448 M. 2018 Measurement error is often neglected in medical literature: a systematic  
449 review. *J Clin Epidemiol*, **98**, 89-97. (doi: 10.1016/j.jclinepi.2018.02.023)
- 450 [15] Rohlf FJ, Slice D. 1990 Extensions of the Procrustes method for the optimal  
451 superimposition of landmarks. *Syst Biol*, **39**, 40-59. (doi: 10.2307/2992207)
- 452 [16] Dryden IL, Mardia KV. *Statistical Shape Analysis*. Chichester: Wiley, 1998.



- 453 [17] Kaliontzopoulou A. 2011. Geometric morphometrics in herpetology: modern tools  
454 for enhancing the study of morphological variation in amphibians and reptiles. *Basic*  
455 *and Applied Herpetology*, **25**, 5-32. (doi: 10.11160/bah.11016)
- 456 [18] Viscosi V, Cardini A. 2011 Leaf morphology, taxonomy and geometric  
457 morphometrics: a simplified protocol for beginners. *PloS one*, **6**, e25630. (doi:  
458 10.1371/journal.pone.0025630)
- 459 [19] Cardini A. 2016 Lost in the other half: improving accuracy in geometric  
460 morphometric analyses of one side of bilaterally symmetric structures. *Syst Biol*, **65**,  
461 1096-1106. (doi: 10.1093/sysbio/syw043)
- 462 [20] Cardini A, Loy A. 2013 Virtual Morphology and Evolutionary Morphometrics in  
463 the New Millennium. *Hystrix*, **24**, 1–140. (doi: 10.4404/hystrix-24.1-8749)
- 464 [21] Arnqvist G, Martensson T. 1998 Measurement error in geometric morphometrics:  
465 empirical strategies to assess and reduce its impact on measures of shape. *Acta Zool*  
466 *Academ Sci Hung*, **44**, 73-96.
- 467 [22] Rohlf FJ. 2003. Bias and error in estimates of mean shape in geometric  
468 morphometrics. *J Hum Evol*, **44**, 665-683. (doi: 10.1016/S0047-2484(03)00047-2)
- 469 [23] Cardini A, Elton S. 2007 Sample size and sampling error in geometric  
470 morphometric studies of size and shape. *Zoomorphology*, **126**, 121-134. (doi:  
471 10.1007/s00435-007-0036-2)
- 472 [24] Fruciano C. 2016 Measurement error in geometric morphometrics. *Dev Genes*  
473 *Evol*, **226**, 139-158. (doi: 10.1007/s00427-016-0537-4)
- 474 [25] Riaño HC, Jaramillo N, Dujardin JP. 2009. Growth changes in *Rhodnius pallescens*  
475 under simulated domestic and sylvatic conditions. *Infect Genet Evol*, **9**, 162-168. (doi:  
476 10.1016/j.meegid.2008.10.009)
- 477 [26] Martinez PA, Berbel-Filho WM, Jacobina UP. 2013 Is formalin fixation and  
478 ethanol preservation able to influence in geometric morphometric analysis? Fishes as a  
479 case study. *Zoomorphology*, **132**, 87-93. (doi: 10.1007/s00435-012-0176-x)
- 480 [27] Cardini, A. L. (2014). Missing the third dimension in geometric morphometrics:  
481 how to assess if 2D images really are a good proxy for 3D structures? *Hystrix*, **25**, 73-  
482 81. (doi: 10.4404/hystrix-25.2-10993)
- 483 [28] Cummaudo M, Guerzoni M, Marasciuolo L, Gibelli D, Cigada A, Obertovà Z,  
484 Ratnayake M, Poppa P, Gabriel P, Ritz-Timme S, Cattaneo C. 2013 Pitfalls at the root  
485 of facial assessment on photographs: a quantitative study of accuracy in positioning  
486 facial landmarks. *Int J Legal Med*, **127**, 699-706. (doi: 10.1007/s00414-013-0850-7)



- 487 [29] von Cramon-Taubadel N, Frazier BC, Lahr MM. 2007 The problem of assessing  
488 landmark error in geometric morphometrics: theory, methods, and modifications. *Am J*  
489 *Phys Anthropol*, **134**, 24-35. (doi: 10.1002/ajpa.20616)
- 490 [30] Fagertun J, Harder S, Rosengren A, Moeller C, Werge T, Paulsen RR, Hansen TF.  
491 2014 3D facial landmarks: Inter-operator variability of manual annotation. *BMC Med*  
492 *Imaging*, **14**, 35. (doi: 10.1186/1471-2342-14-35)
- 493 [31] Bookstein, F. Morphometric Tools for Landmark Data: Geometry and Biology.  
494 Cambridge: Cambridge University Press, 1991.
- 495 [32] Williams FLE, Richtsmeier JT. 2003 Comparison of mandibular landmarks from  
496 computed tomography and 3D digitizer data. *Clin Anat*, **16**, 494-500. (doi:  
497 10.1002/ca.10095)
- 498 [33] Ross AH, Williams S. 2008 Testing repeatability and error of coordinate landmark  
499 data acquired from crania. *J Forensic Sci*, **53**, 782-785. (doi: 10.1111/j.1556-  
500 4029.2008.00751.x)
- 501 [34] Barbeito-Andrés J, Anzelmo M, Ventrice F, Sardi ML. 2012 Measurement error of  
502 3D cranial landmarks of an ontogenetic sample using computed tomography. *J Oral*  
503 *Biol Craniofac Res*, **2**, 77-82. (doi: 10.1016/j.jobcr.2012.05.005)
- 504 [35] Slice, D. E. Modern morphometrics. In Modern morphometrics in physical  
505 anthropology. Boston: Springer, 2005. pp. 1-45.
- 506 [36] Rohlf FJ, Marcus LF. 1993 A revolution morphometrics. *Trends Ecol Evol*, **8**, 129-  
507 132. (doi: 10.1016/0169-5347(93)90024-J)
- 508 [37] Gunz P, Mitteroecker P. 2013 Semilandmarks: a method for quantifying curves and  
509 surfaces. *Hystrix*, **24**, 103-109. (doi: 10.4404/hystrix-24.1-6292)
- 510 [38] De Groote I, Lockwood CA, Aiello LC. 2010 A new method for measuring long  
511 bone curvature using 3D landmarks and semi-landmarks. *Am J Phys Anthropol*, **141**,  
512 658-664. (doi: 10.1002/ajpa.21225)
- 513 [39] Vrdoljak J, Padró J, De Panis D, Soto IM, Carreira VP. 2019 Protein–alkaloid  
514 interaction in larval diet affects fitness in cactophilic *Drosophila* (Diptera:  
515 Drosophilidae). *Biol J Linn Soc Lond*, **127**, 44-55. (doi: 10.1093/biolinnean/blz028)
- 516 [40] Klein LL, Caito M, Chapnick C, Kitchen C, O’Hanlon R, Chitwood DH, Miller AJ.  
517 2017 Digital morphometrics of two North American Grapevines (*Vitis*: Vitaceae)  
518 quantifies leaf variation between species, within species, and among individuals. *Front*  
519 *Plant Sci*, **8**, 373. (doi: 10.3389/fpls.2017.00373)

- 520 [41] Medina CD, Avila LJ, Sites Jr JW, Santos J, Morando M. 2018 Alternative  
521 methods of phylogenetic inference for the Patagonian lizard group *Liolaemus*  
522 *elongatus-kriegi* (Iguania: Liolaemini) based on mitochondrial and nuclear markers.  
523 *Mol Phylogenet Evol*, **120**, 158-169. (doi: 10.1016/j.ympev.2017.11.017)
- 524 [42] Rohlf FJ. 2015 tpsDig, version 2.16 *Ecol Evol*. Suny at stony Brook available at  
525 <http://life.bio.sunysb.edu/morph>.
- 526 [43] Gower JC. 1975 Generalized procrustes analysis. *Psychometrika*, **40**, 33-51. (doi:  
527 10.1007/BF02291478)
- 528 [44] Zelditch ML, Swiderski DL, Sheets HD. Geometric morphometrics for biologists:  
529 a primer. London: Elsevier Academic Press, 2012.
- 530 [45] Kuhl FP, Giardina CR. 1982 Elliptic Fourier features of a closed contour.  
531 *Computer graphics and image processing*, **18**, 236-258. (doi: 10.1016/0146-  
532 664X(82)90034-X)
- 533 [46] R Core Team. 2017 R: A language and environment for statistical computing.  
534 Vienna: R Foundation for Statistical Computing. Available at: [https://www.R-](https://www.R-project.org/)  
535 [project.org/](https://www.R-project.org/)
- 536 [47] Bonhomme V, Picq S, Gaucherel C, Claude J. 2014. Momocs: outline analysis  
537 using R. *J Stat Softw*, **56**, 1-24.
- 538 [48] Adams DC, Collyer ML, Kaliontzopoulou A. 2018 Geomorph: software for  
539 geometric morphometric analyses. R package version 3.0.6. Available at [https://cran.r-](https://cran.r-project.org/package=geomorph)  
540 [project.org/package=geomorph](https://cran.r-project.org/package=geomorph).
- 541 [49] Carreira VP, Soto IM, Fanara JJ, Hasson E. 2008 A study of wing morphology and  
542 fluctuating asymmetry in interspecific hybrids between *Drosophila buzzatii* and *D.*  
543 *koepferae*. *Genetica*, **133**, 1-11. (doi: 10.1007/s10709-007-9176-z)
- 544 [50] Klingenberg CP. 2009 Morphometric integration and modularity in configurations  
545 of landmarks: tools for evaluating a priori hypotheses. *Evol Dev* **11**, 405-421. (doi:  
546 10.1111/j.1525-142X.2009.00347.x)
- 547 [51] Plummer M. 2003 JAGS: A program for analysis of Bayesian graphical models  
548 using Gibbs sampling. In *Proceedings of the 3rd international workshop on distributed*  
549 *statistical computing* (Vol. 124, No. 125, p. 10).
- 550 [52] Kellner K. 2018 jagsUI: A Wrapper Around 'rjags' to Streamline 'JAGS' Analyses.  
551 R package version 1.5.0. Available at <https://CRAN.R-project.org/package=jagsUI>
- 552 [53] Plummer M, Stukalov A. 2018 rjags: Bayesian graphical models using MCMC.  
553 Available at <https://cran.r-project.org/web/packages/rjags/index.html>.

- 554 [54] Kruschke J. 2014 Doing Bayesian data analysis: A tutorial with R, JAGS, and Stan.  
555 Academic Press, Boston, USA
- 556 [55] Gelman A, Rubin DB. 1992 Inference from iterative simulation using multiple  
557 sequences. *Stat Sci*, **7**, 457-472.
- 558 [56] Gelman A, Carlin JB, Stern HS, Dunson DB, Vehtari A, Rubin DB. Bayesian data  
559 analysis. Chapman and Hall/CRC, 2013.
- 560 [57] McElreath R. Statistical rethinking: A Bayesian course with examples in R and  
561 Stan. Chapman and Hall/CRC, 2018.
- 562 [58] Maxwell SE, Lau MY, Howard GS. 2015 Is psychology suffering from a  
563 replication crisis? What does “failure to replicate” really mean? *Am Psychol*, **70**, 487.  
564 (doi: 10.1037/a0039400)
- 565 [59] Hedges LV, Olkin I. Statistical methods for meta-analysis. Florida: Academic  
566 Press, 1985.
- 567 [60] Plummer M, Best N, Cowles K, Vines K. 2006 CODA: convergence diagnosis and  
568 output analysis for MCMC. *R news*, **6**, 7-11.
- 569 [61] Campomanes-Álvarez BR, Ibáñez O, Navarro F, Alemán I, Cordón O, Damas S.  
570 2015 Dispersion assessment in the location of facial landmarks on photographs. *Int J*  
571 *Legal Med*, **129**, 227-236. (doi: 10.1007/s00414-014-1002-4)
- 572 [62] Robinson C, Terhune CE. 2017 Error in geometric morphometric data collection:  
573 Combining data from multiple sources. *Am J Phys Anthropol*, **164**, 62-75. (doi:  
574 10.1002/ajpa.23257)
- 575 [63] Fruciano C, Celik MA, Butler K, Dooley T, Weisbecker V, Phillips MJ. 2017  
576 Sharing is caring? Measurement error and the issues arising from combining 3D  
577 morphometric datasets. *Ecol Evol*, **7**, 7034-7046. (doi: 10.1002/ece3.3256)
- 578 [64] Shearer BM, Cooke SB, Halenar LB, Reber SL, Plummer JE, Delson E, Tallman  
579 M. 2017 Evaluating causes of error in landmark-based data collection using scanners.  
580 *PloS one*, **12**, e0187452. (doi: 10.1371/journal.pone.0187452)
- 581 [65] Begley CG, Ellis LM. 2012 Drug development: Raise standards for preclinical  
582 cancer research. *Nature*, **483**, 531. (doi: 10.1038/483531a)
- 583 [66] Freedman LP, Cockburn IM, Simcoe TS. 2015 The economics of reproducibility in  
584 preclinical research. *PLoS biology*, **13**, e1002165. (doi: 10.1371/journal.pbio.1002165)
- 585 [67] Ioannidis JP. 2005. Why most published research findings are false. *PLoS*  
586 *medicine*, **2**, e124. (doi: 10.1371/journal.pmed.0020124)

- 587 [68] Marcy AE, Fruciano C, Phillips MJ, Mardon K, Weisbecker V. 2018 Low  
588 resolution scans can provide a sufficiently accurate, cost-and time-effective alternative  
589 to high resolution scans for 3D shape analyses. *PeerJ*, **6**, e5032. (doi:  
590 10.7717/peerj.5032)
- 591 [69] Viscosi V. 2015 Geometric morphometrics and leaf phenotypic plasticity:  
592 assessing fluctuating asymmetry and allometry in European white oaks (*Quercus*). *Bot*  
593 *J Linn Soc*, **179**, 335-348. (doi: 10.1111/boj.12323)
- 594 [70] Marín AG, Minoli I, Morando M, Avila LJ. 2016. A new lizard species of the  
595 *Phymaturus patagonicus* group (Squamata: Liolaemini) from northern Patagonia,  
596 Neuquén, Argentina. *Zootaxa*, **4121**, 412-430. (doi: 10.11646/zootaxa.4121.4.3)
- 597 [71] Barrientos-Villalobos J, Schmitter-Soto JJ, De Los Monteros AJE. 2018 Several  
598 subspecies or phenotypic plasticity? A geometric morphometric and molecular analysis  
599 of variability of the Mayan cichlid *Mayaheros urophthalmus* in the Yucatan. *Copeia*,  
600 **106**, 268-278. (doi: 10.1643/CI-17-657)
- 601 [72] Klingenberg C. 2015 Analyzing fluctuating asymmetry with geometric  
602 morphometrics: concepts, methods, and applications. *Symmetry*, **7**, 843-934. (doi:  
603 10.3390/sym7020843)
- 604 [73] Soto IM, Carreira VP, Soto EM, Hasson E. 2008 Wing morphology and fluctuating  
605 asymmetry depend on the host plant in cactophilic *Drosophila*. *J Evol Biol*, **21**, 598-609.  
606 (doi: 10.1111/j.1420-9101.2007.01474.x)
- 607 [74] MacLeod N, Krieger J, Jones KE. 2013 Geometric Morphometric Approaches to  
608 Acoustic Signal Analysis in Mammalian Biology. *Hystrix* **24**, 110-125. (doi:  
609 10.4404/hystrix-24.1-6299)
- 610 [75] Franklin D, Oxnard CE, O'Higgins P, Dadour I. 2007 Sexual dimorphism in the  
611 subadult mandible: quantification using geometric morphometrics. *J Forensic Sci*, **52**,  
612 6-10. (doi: 10.1111/j.1556-4029.2006.00311.x)
- 613 [76] Kimmerle EH, Ross A, Slice D. 2008 Sexual dimorphism in America: geometric  
614 morphometric analysis of the craniofacial region. *J Forensic Sci*, **53**, 54-57. (doi:  
615 10.1111/j.1556-4029.2007.00627.x)
- 616 [77] Gelman A, Carlin J. 2014 Beyond power calculations: Assessing type S (sign) and  
617 type M (magnitude) errors. *Perspect Psychol Sci*, **9**, 641-651. (doi:  
618 10.1177/1745691614551642)
- 619 [78] Dupré J. The disorder of things: Metaphysical foundations of the disunity of  
620 science. Boston: Harvard University Press, 1995.

621 [79] Garnett ST, Christidis L. 2017 Taxonomy anarchy hampers conservation. *Nature*  
622 *News*, **546**, 25. (doi: 10.1038/546025a)

623 [80] Conix S. 2019 In defence of taxonomic governance. *Org Divers Evol*, **19**, 87-97.  
624 (doi: 10.1007/s13127-019-00391-6)

625 [81] Raposo MA, Stopiglia R, Brito GRR, Bockmann FA, Kirwan GM, Gayon J,  
626 Dubois A. 2017 What really hampers taxonomy and conservation? A riposte to Garnett  
627 and Christidis (2017). *Zootaxa*, **4317**, 179-184. (doi: 10.11646/zootaxa.4317.1.10)

628 [82] Zachos FE. 2018 Mammals and meaningful taxonomic units: the debate about  
629 species concepts and conservation. *Mamm Rev*, **48**, 153-159. (doi: 10.1111/mam.12121)

630

### 631 **Figures**

632

633 Figure 1: Posterior mean and High Posterior Density interval (HPD) of 90% (bold line)  
634 and 95% (thin line) for each source of variation: sp: Specimen, side: Side, op: Operator,  
635 error: Measurement error. \* denote interaction between sources of variation. Protocols:  
636 P-S: Partial-Semilandmark, F-S: Full-Semilandmarks, C: Contour, P-L: Partial-  
637 Landmark, F-L: Full-Landmark. Box of the top, percentage of variation explained by  
638 the first principal component for each protocol.

639

640 Figure 2: Barplot of posterior mean and High Posterior Density interval (error bars) of  
641 95% measurement error (light gray bars) and replication factors (dark gray bars).  
642 Protocols: P-S: Partial-Semilandmark, F-S: Full-Semilandmarks, Cont: Contour, P-L:  
643 Partial-Landmark, F-L: Full-Landmark. Percentage of variance explained by each  
644 principal component analyzed on top of the bars. ggplot2 (Wickham, 2016) was used to  
645 develop this figure.

646

647 Figure 3: Posterior mean and High Posterior Density interval (error bars) of 95%  
648 measurement error vs mean and standard deviation of processing time. Protocols: P-S:  
649 Partial-Semilandmark, F-S: Full-Semilandmarks, Cont: Contour, P-L: Partial-  
650 Landmark, F-L: Full-Landmark. The Principal Components are represented by a gray  
651 shade scale, where the darker points and lines correspond to the first PC and the  
652 subsequent ones increasingly clearer.

653

654 Figure S1: Different shape changes. a) Changes between the same specimen digitized  
655 by different operators on Full-Landmark protocol. b) Changes between the same  
656 specimen digitized by different operators on Partial-Landmark protocol. c) Changes  
657 between consensus and a randomized specimen on Full-Semilandmak (top) and Partial-  
658 Semilandmark (down) protocols. Note the change similarities between protocols  
659 (marked with arrows). d) Changes between consensus and a randomized specimen  
660 (same that c for a better compression) on Full-Landmak (top) and Partial-Landmark  
661 (down) protocols. Note the change dissimilarities between protocols (marked with  
662 arrows).

663

664 Figure S2: Posterior mean and High Posterior Density interval (HPD) of 90% (bold  
665 line) and 95% (thin line) for each source of variation: sp: Specimen, side: Side, op:  
666 Operator, error: Measurement error. Aesthetics denote interaction between sources of  
667 variation. Protocols: P-S: Partial-Semilandmark, F-S: Full-Semilandmarks, C: Contour,  
668 P-L: Partial-Landmark, F-L: Full-Landmark. In the box of the top, percentage of  
669 variation explained by the second principal component for each protocol.

670

671 Figure S3: Correlation between time (in seconds) and size for landmark and  
672 semilandmark protocols in each taxon. Green: lizards (*Liolaemus elongatus*); blue: flies  
673 (*Drosophila buzzatii*); red: leaves (*Vitis riparia*). Continuum lines represent the lineal  
674 regression whereas dashed lines represent the simulation of credibility interval.

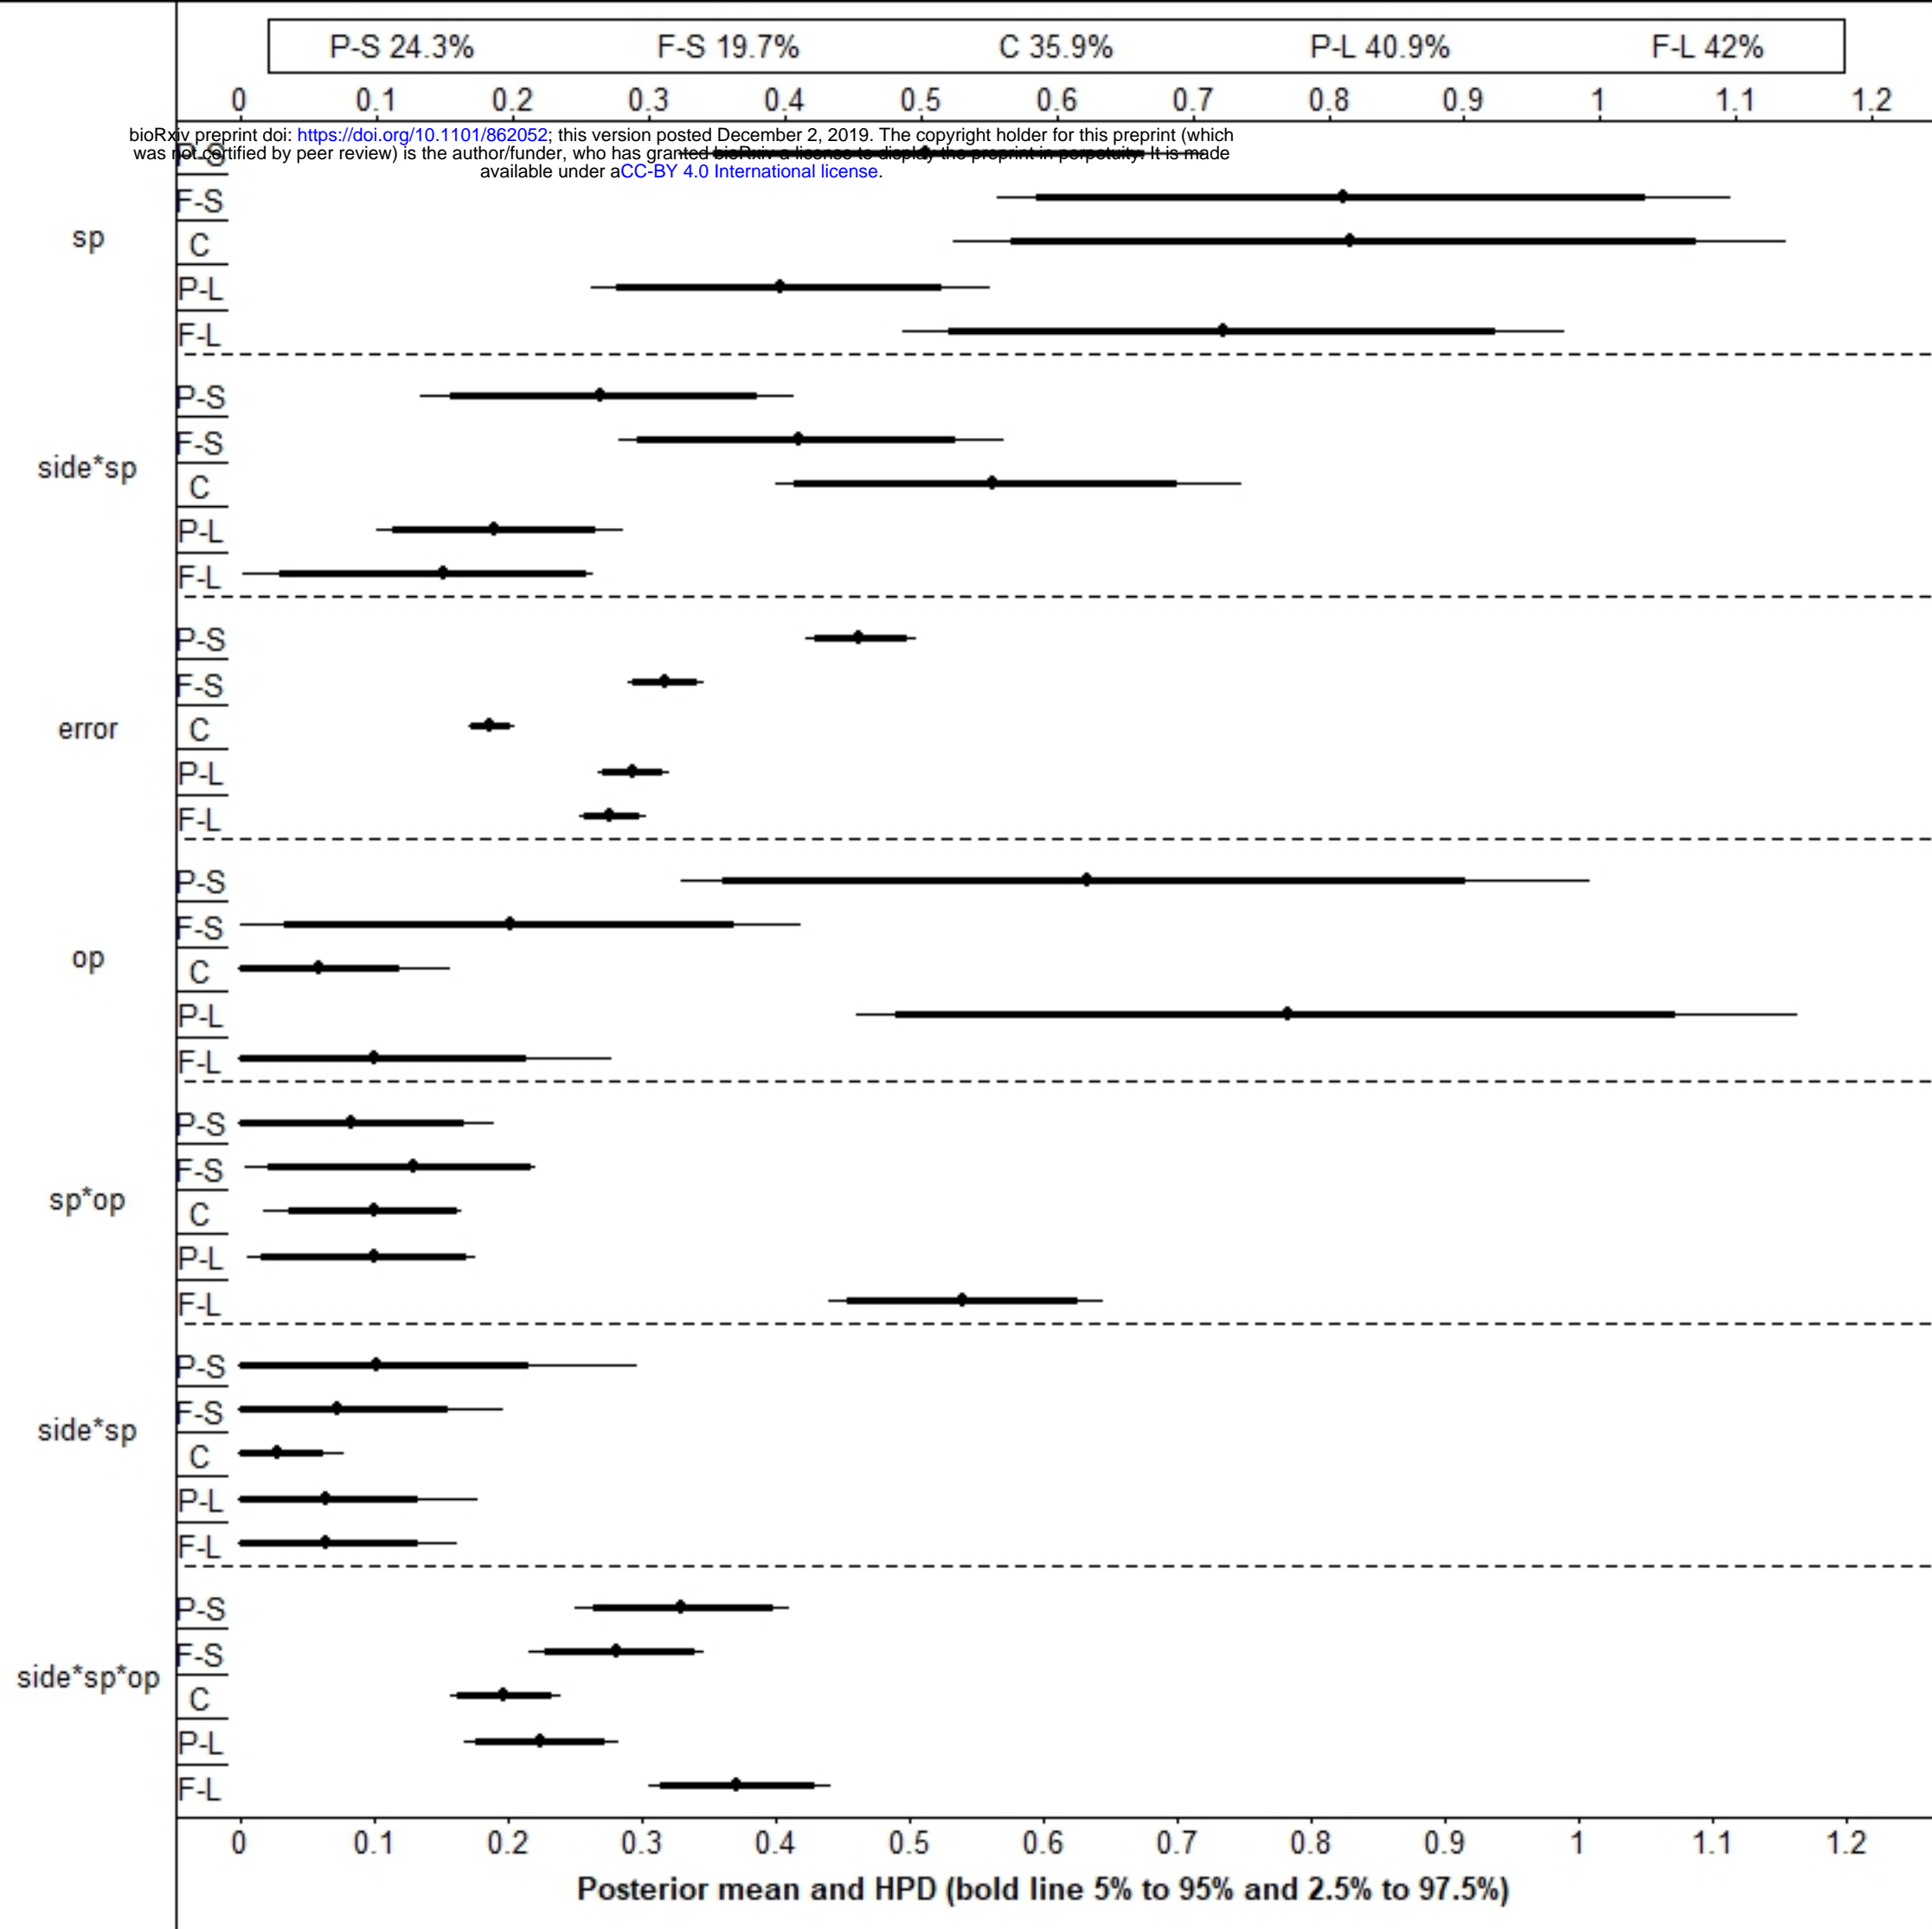

Figure 1



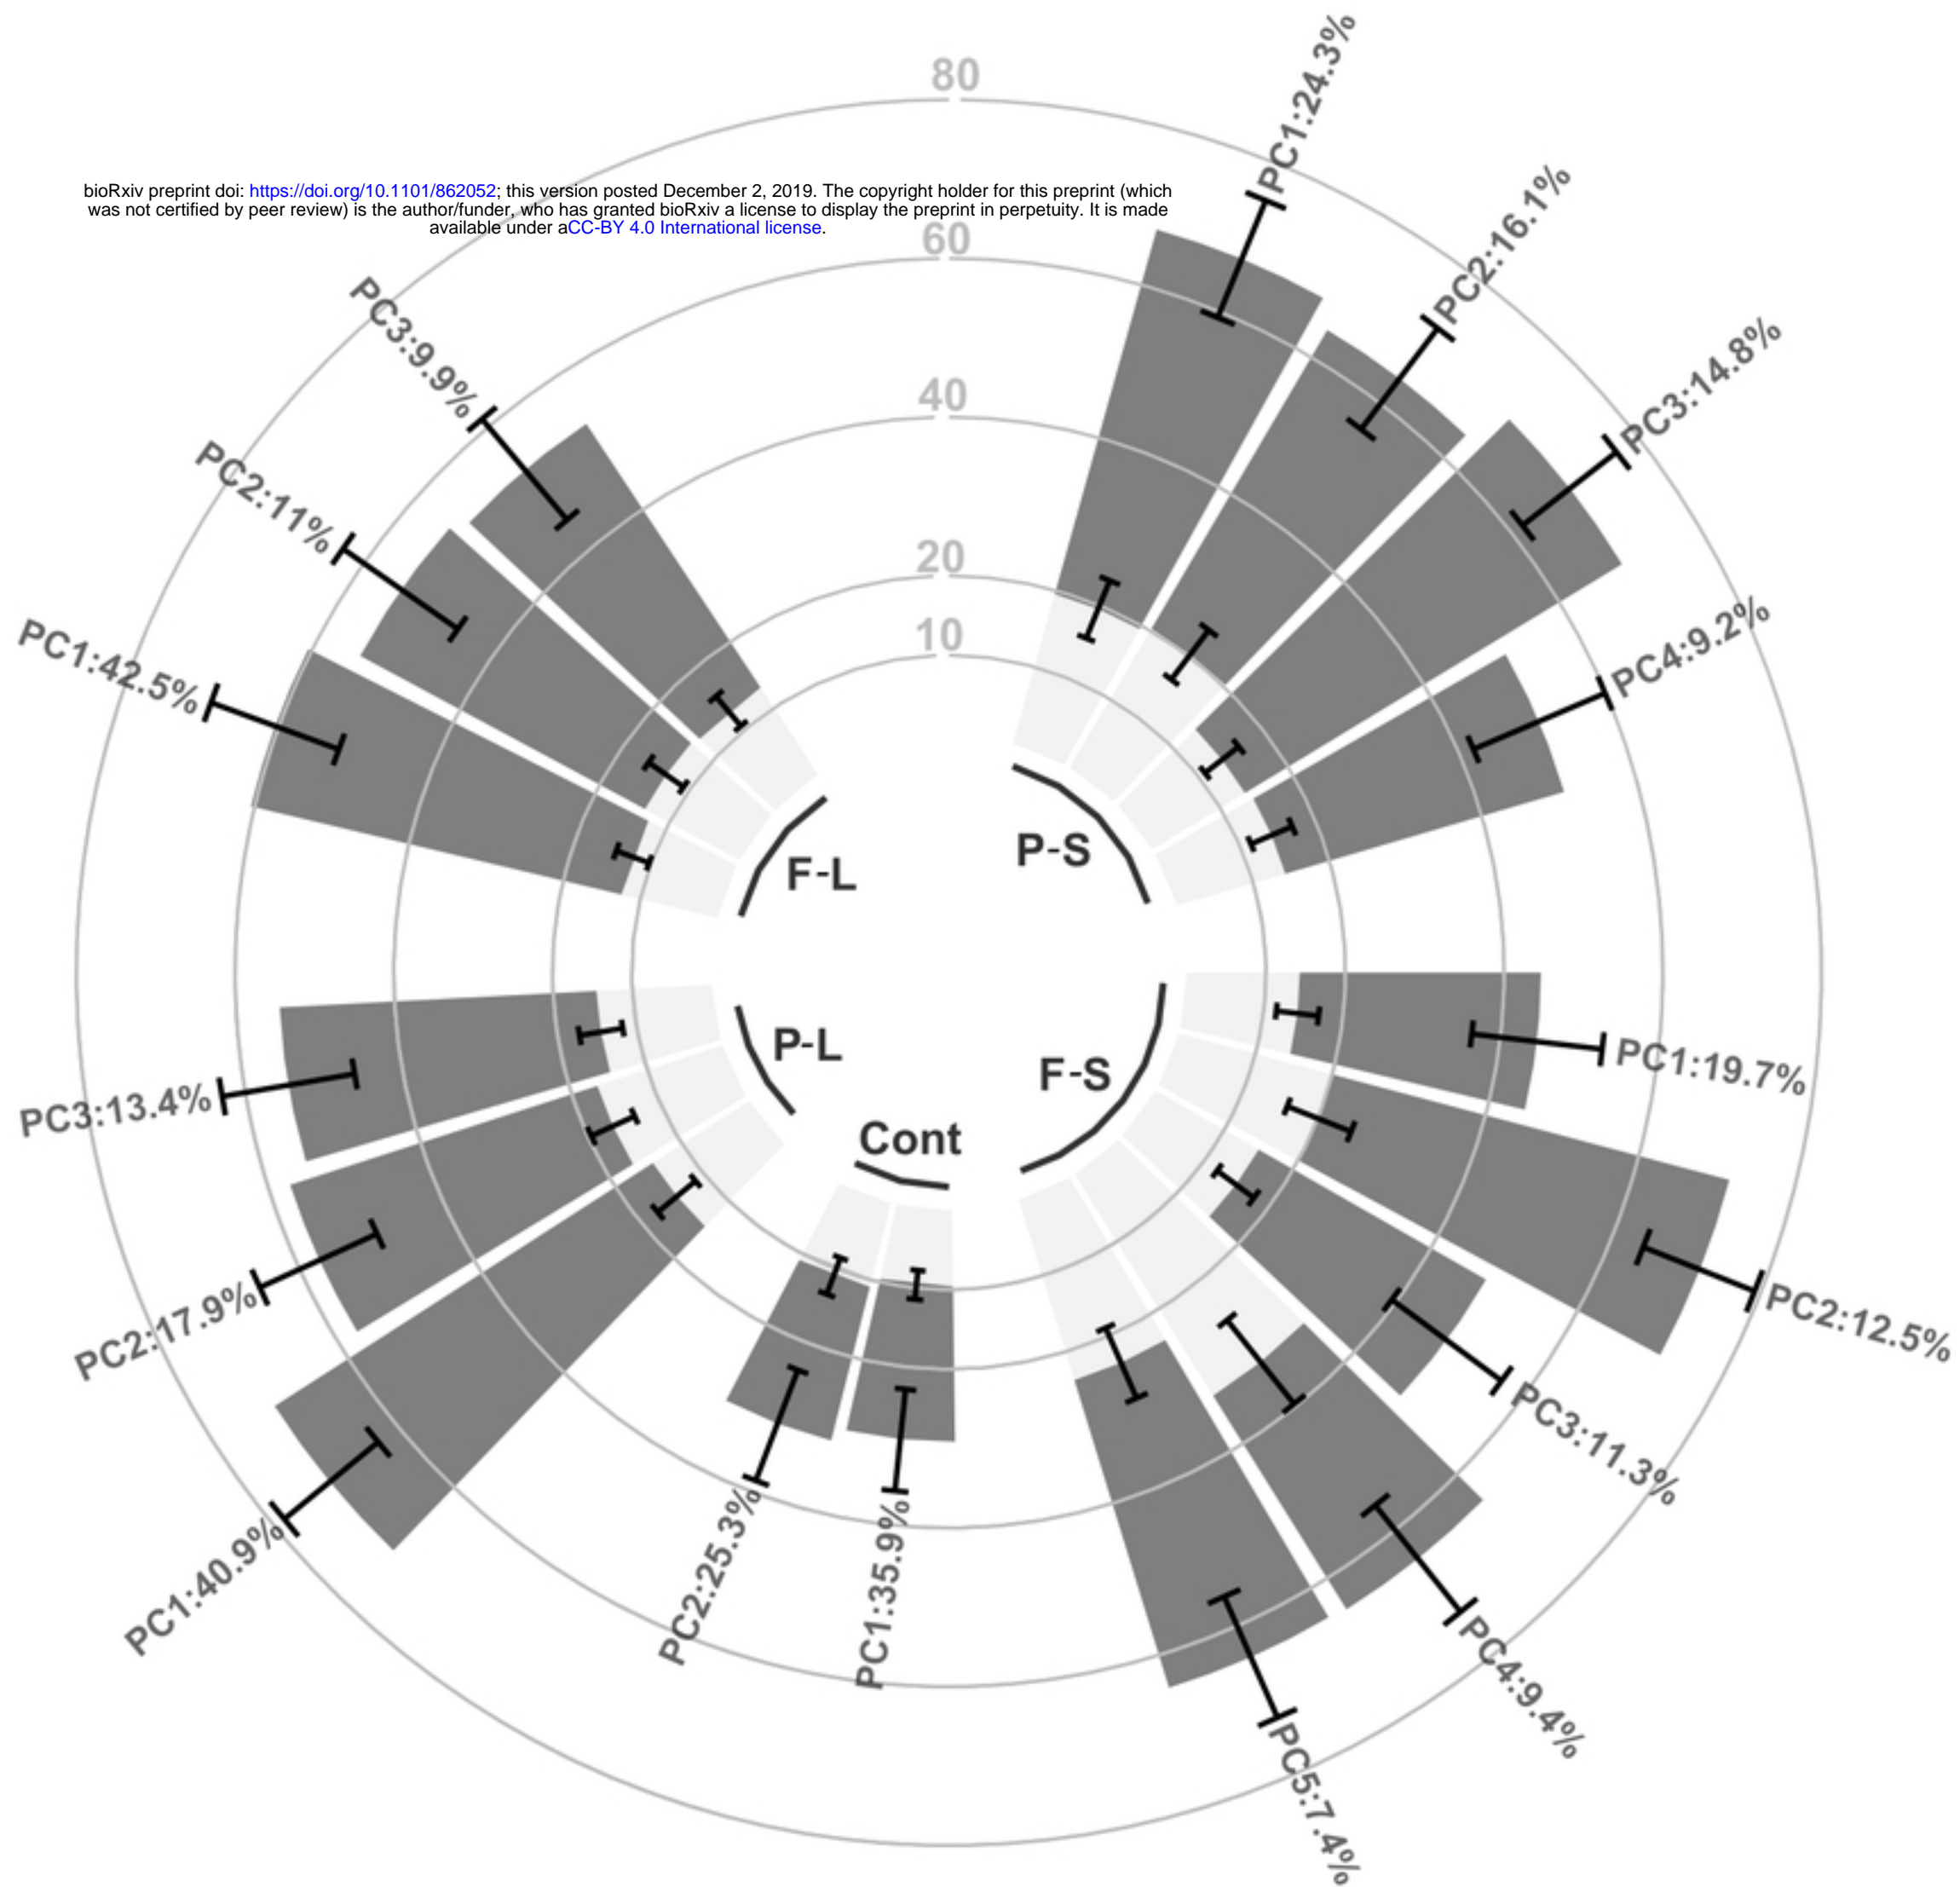

Figure 2

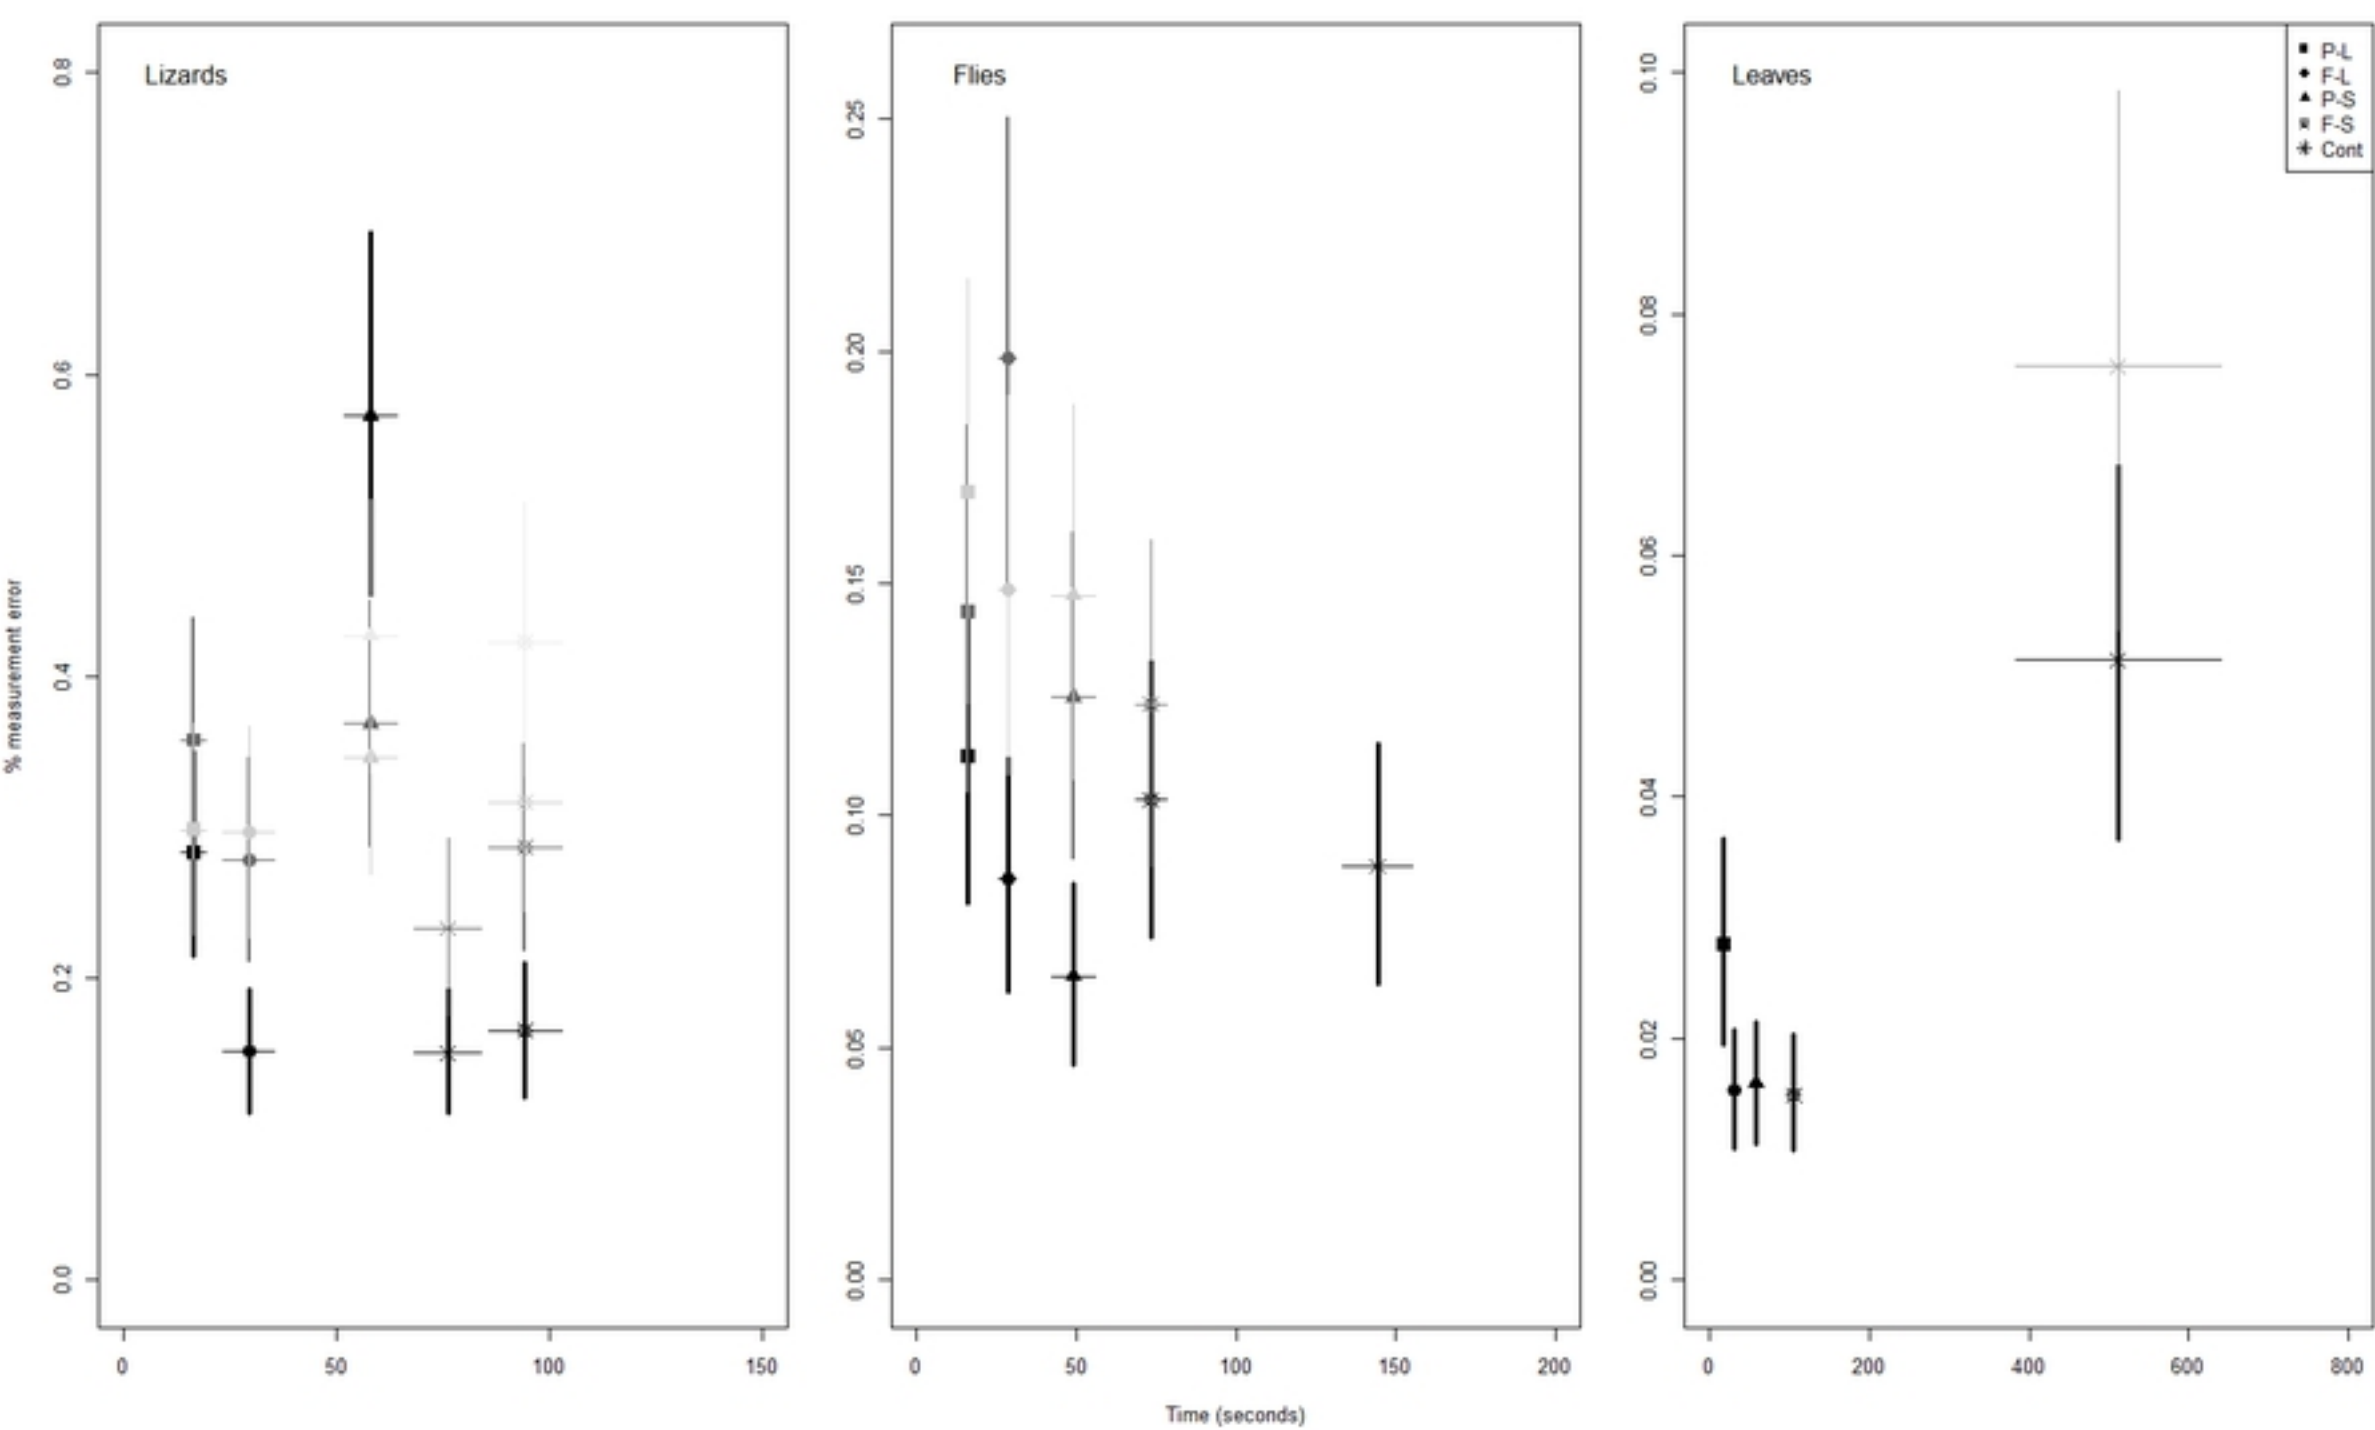

Figure 3

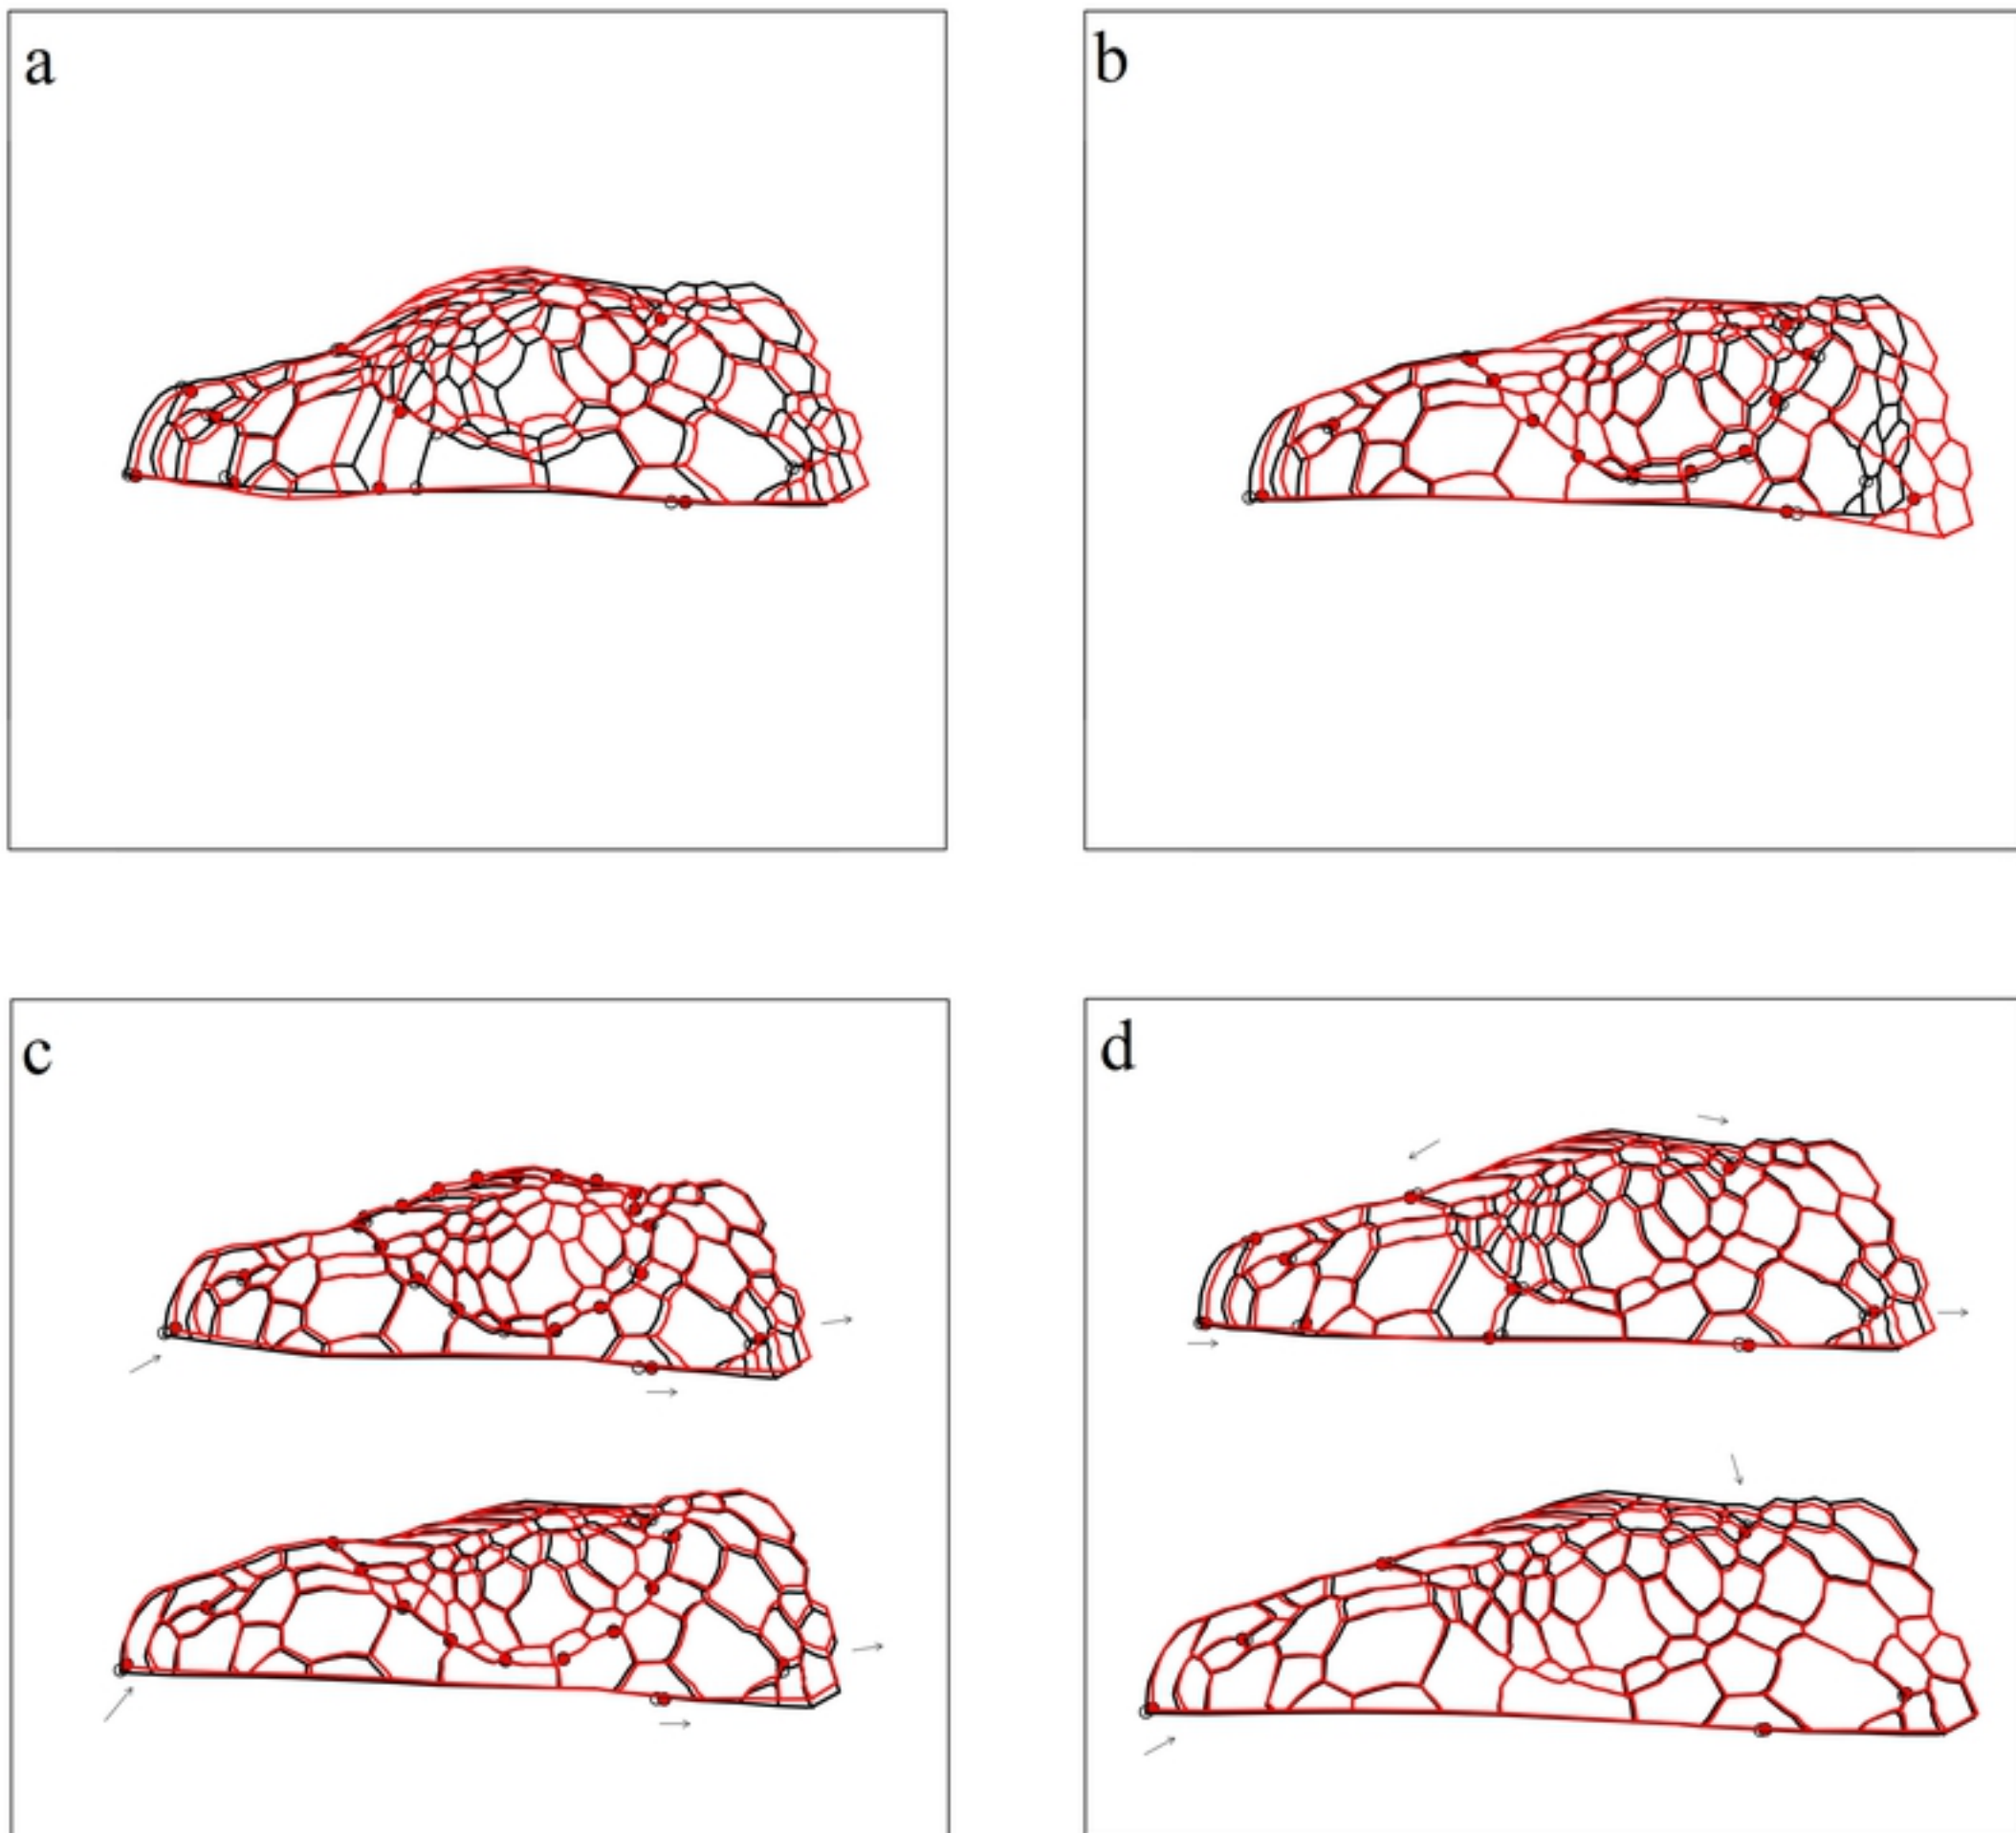

Figure S1

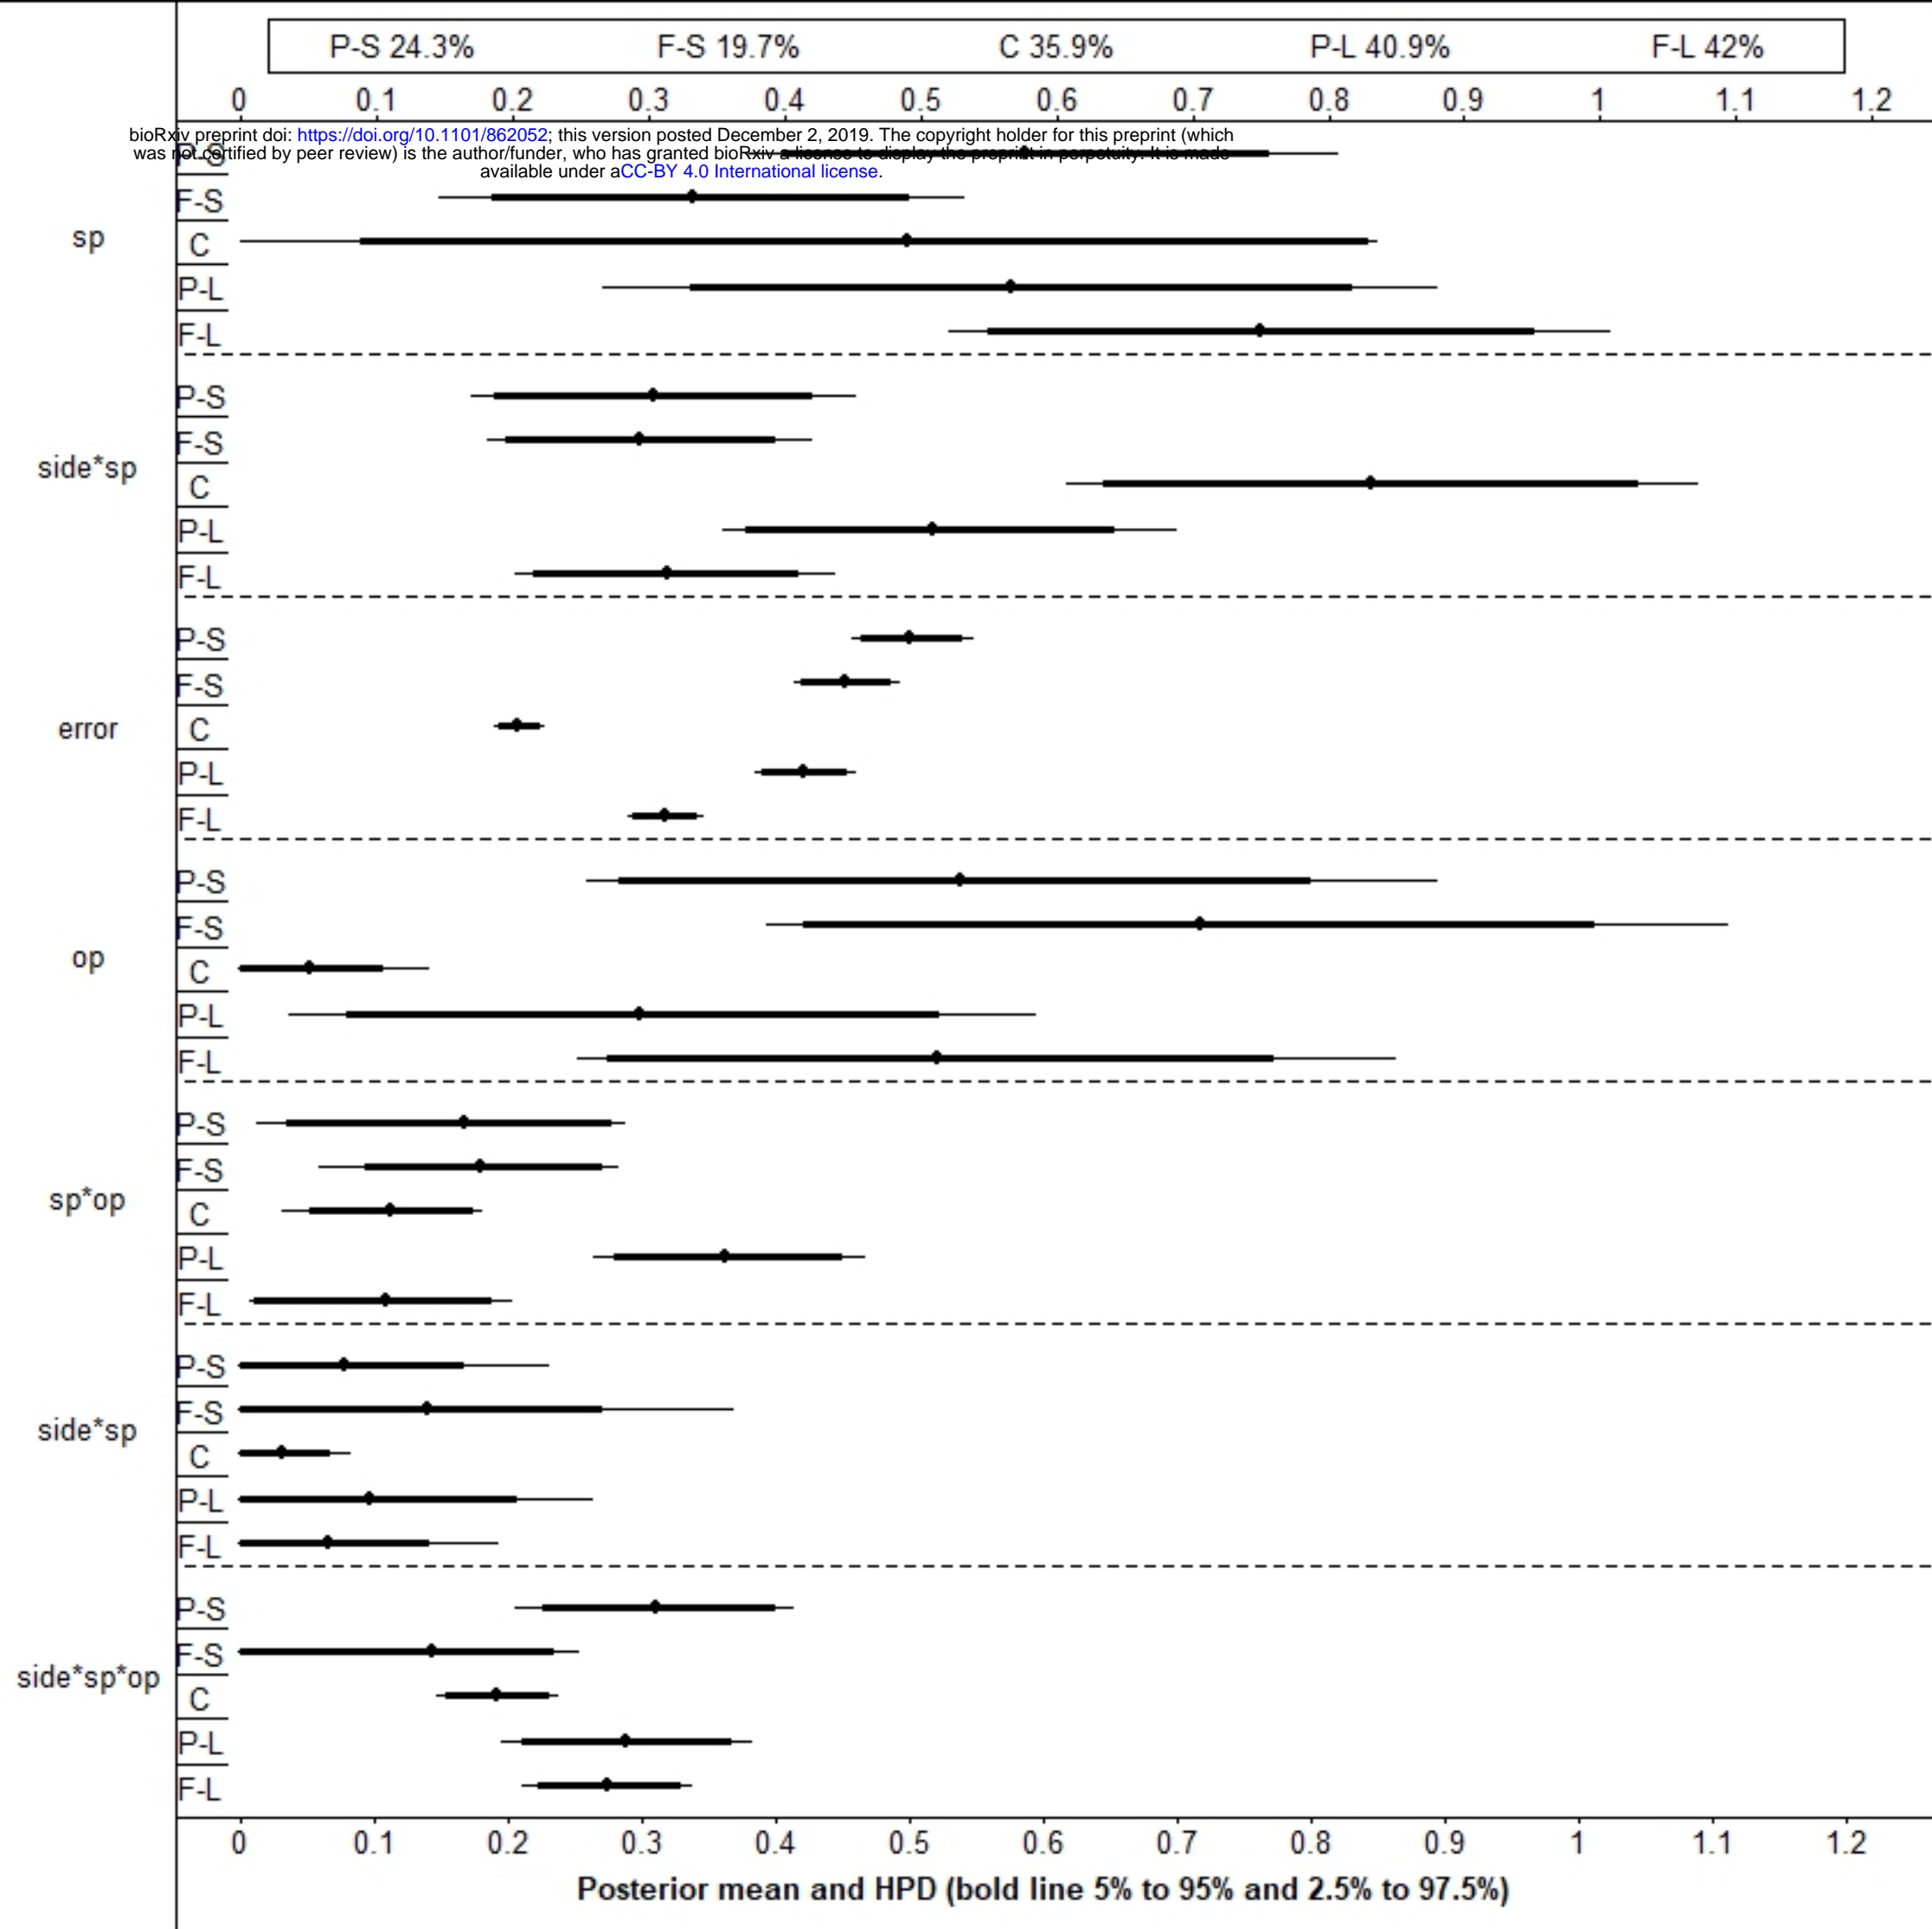

Figure S2

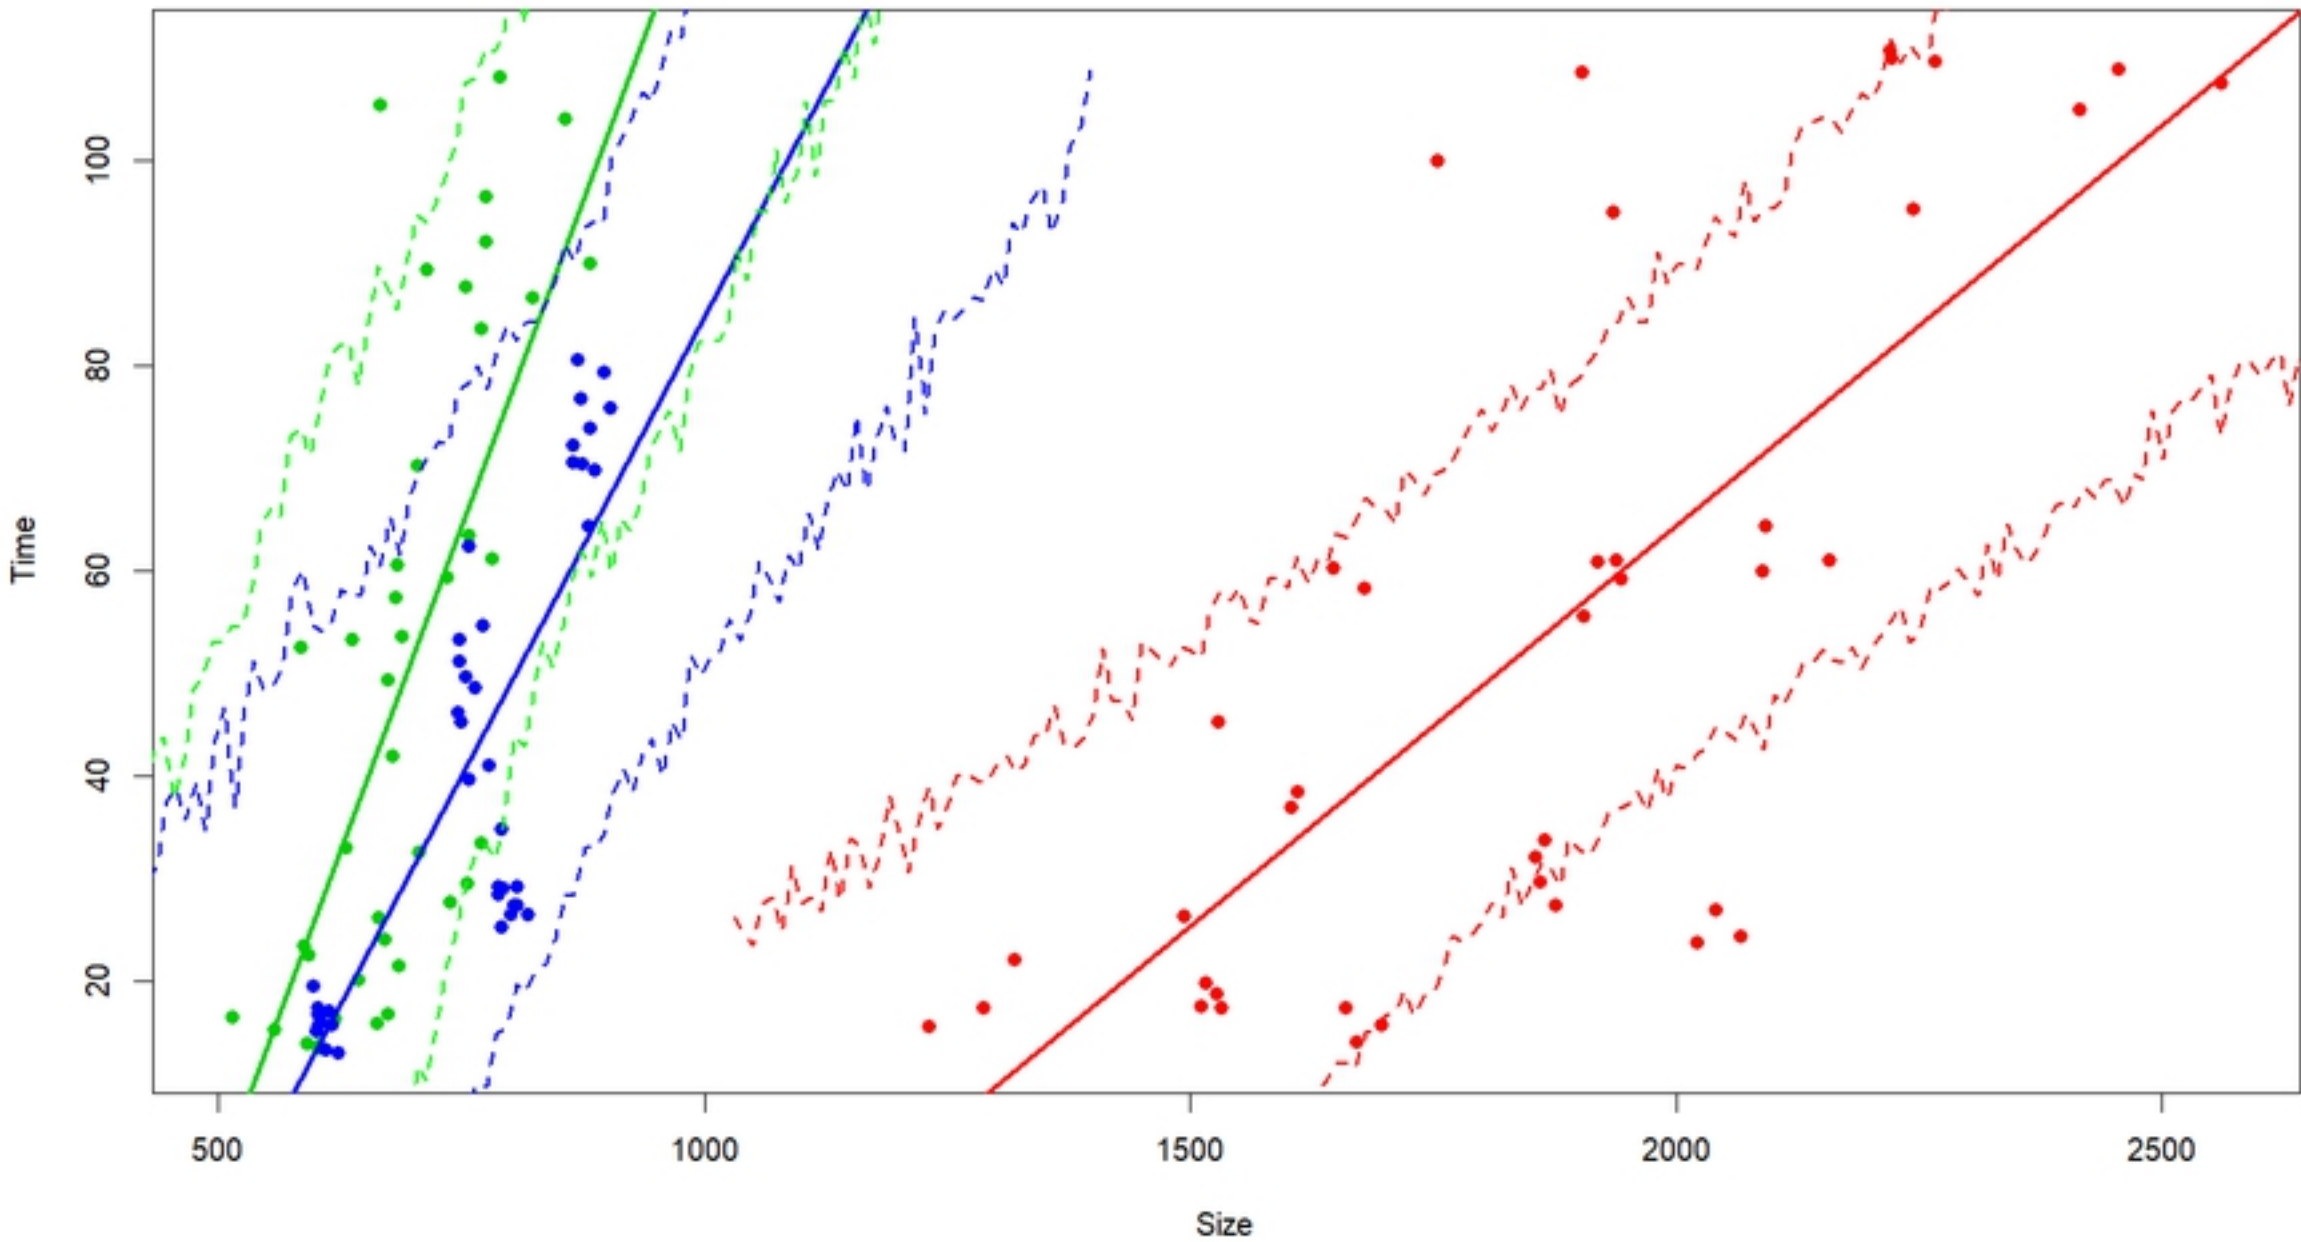

Figure S3
